# Supplementary material for: Synthesis of N-alkoxyphthalimide derivatives via PIDA-promoted cross dehydrogenative coupling reaction
Source: Royal Society of Chemistry journal article supplement (doi:10.1039/d1ra00375e), 2021-01-01

## Synthesis of N-alkoxyphthalimide Derivatives via PIDA-promoted Dehydrogenative Coupling Reaction

Rongxiang Chen,<sup>a</sup> Bing Liu,<sup>b</sup> Wenbo Li,<sup>b</sup> Kai-Kai Wang,<sup>\*a</sup> Changqing Miao,<sup>b</sup> Zhizhuang Li,<sup>b</sup> Yingjie Lv<sup>c</sup> and Lantao Liu<sup>\*d</sup>

<sup>a</sup> School of Pharmacy, Xinxiang University, Xinxiang 453000, P.R. of China.

<sup>b</sup> School of Chemistry and Materials Engineering, Xinxiang University, Xinxiang 453000, P.R. of China.

<sup>c</sup> Xinxiang Tuoxin Pharmaceutical Company Limited, Xinxiang 453000, P.R. of China.

<sup>d</sup> College of Chemistry and Chemical Engineering, Shangqiu Normal University, Shangqiu, Henan, 476000, P. R. China.

Email: wangkaikai@163.com; liult05@iccas.ac.cn

Supporting Information

### List of Contents

|                                               |     |
|-----------------------------------------------|-----|
| 1. General information.....                   | S2  |
| 2. General procedures for reactions .....     | S2  |
| 3. X-ray crystal structure of <b>3f</b> ..... | S4  |
| 4. Compound characterizations.....            | S7  |
| 5. Reference .....                            | S14 |
| 6. Spectroscopic data for products .....      | S15 |

## 1. General information

All manipulations were carried out under air atmosphere. Column chromatography was generally performed on silica gel (300-400 mesh) and reactions were monitored by thin layer chromatography (TLC) using UV light to visualize the course of the reactions. The  $^1\text{H}$  NMR (400 MHz),  $^{13}\text{C}$  NMR (100 MHz) and  $^{19}\text{F}$  NMR (376 MHz) data were recorded on a Bruker DPX-400 spectrometer with  $\text{CDCl}_3$  as solvent at room temperature unless specified otherwise. The chemical shifts ( $\delta$ ) are reported in ppm and coupling constants ( $J$ ) in Hz.  $^1\text{H}$  NMR spectra was recorded with tetramethylsilane ( $\delta = 0.00$  ppm) as internal reference;  $^{13}\text{C}$  NMR spectra was recorded with  $\text{CDCl}_3$  ( $\delta = 77.00$  ppm) as internal reference. HRMS were performed on Agilent ESI-quadrupole.

## 2. General procedures for reactions

### 2.1 General procedure of synthesis of $\alpha$ -hydroxyphthalimide ketones

A solution of aryl ketones **1** or **4** (0.3 mmol), N-hydroxyphthalimide **2a** (1.2 equiv, 0.36 mmol), iodobenzene diacetate (1.2 equiv, 0.36 mmol) and dichloromethane (2 mL) was stirred in a 10 mL sealed tube at room temperature under air for 4 h. After completion of the reaction, 5 mL of water was added and extracted by dichloromethane ( $3 \times 5$  mL). The combined organic layer was washed with brine (5 mL) and then dried over anhydrous  $\text{Na}_2\text{SO}_4$  and evaporated in vacuum. The desired products were obtained in the corresponding yields after purification by column chromatography on silica gel eluting with petroleum ether / ethyl acetate.

### 2.2 General procedure of synthesis of gram scale of **3a**

A solution of 1,2-diphenylethanone **1a** (5.0 mmol), N-hydroxyphthalimide **2a** (1.2 equiv, 6.0 mmol), and iodobenzene diacetate (1.2 equiv, 6.0 mmol) and dichloromethane (20 mL) was stirred in a 50 mL sealed tube at room temperature under air for 4 h. After completion of the reaction, 50 mL of water was added and extracted by dichloromethane ( $3 \times 50$  mL). The combined organic layer was washed with brine and then dried over anhydrous  $\text{Na}_2\text{SO}_4$  and evaporated in vacuum. The desired product **3a** were prepared according to the general procedure and purified by column chromatography on silica gel eluting with petroleum ether / ethyl acetate (3:1) as white solid 1.25g (70%).

### 2.3 Synthetic transformations of the product **3a**: oxidation to ester **6**

A solution of **3a** (0.3 mmol), sodium bicarbonate (0.39 mmol, 33 mg), *m*-CPBA (0.45 mmol, 78 mg) and dichloromethane (2 mL) was stirred in a 10 mL sealed tube at 0 °C, then the resultant mixture was stirred at room temperature for 16 h. The progress of the reaction was monitored by

TLC. After completion, the solvent was evaporated on a rotary evaporator and the residue was treated with sodium bicarbonate solution (5 mL). The mixture was extracted with ethyl acetate (3 × 15 mL) and washed with brine (1 × 10 mL) and water (1 × 10 mL). Then dried over anhydrous Na<sub>2</sub>SO<sub>4</sub> and evaporation of the solvent gave a residue that was purified on silica gel column chromatography using petroleum ether / ethyl acetate (4:1) as the eluent to obtain the desired product **6** as white solid 95.1 mg (85%).

#### **2.4 Synthetic transformations of the product 3a: formation of 1,2-diketone 7**

A solution of **3a** (0.3 mmol) and triethylamine (2 mL) was stirred in a 10 mL sealed tube equipped with a reflux condenser. The reaction mixture was heated to 90 °C for 16 h under air. The reaction mixture was cooled and washed with 1M HCl (2 × 15 mL) and extracted with CH<sub>2</sub>Cl<sub>2</sub>, dried over MgSO<sub>4</sub>, filtered, and concentrated. The residue was purified on silica gel column chromatography using petroleum ether / ethyl acetate (20:1) as the eluent to obtain the desired product **7** as yellow solid 59.0 mg (93%).

### 3. X-ray crystal structure of 3f

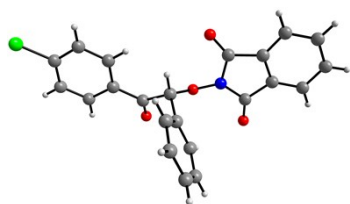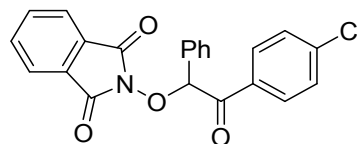

**3f (CCDC 2049393 )**

**Table S1.** Crystal data and structure refinement for **3f**.

|                                   |                                                   |
|-----------------------------------|---------------------------------------------------|
| Empirical formula                 | C <sub>22</sub> H <sub>14</sub> ClNO <sub>4</sub> |
| Formula weight                    | 391.79                                            |
| Temperature                       | 296(2) K                                          |
| Wavelength                        | 71.073 pm                                         |
| Crystal system                    | Monoclinic                                        |
| Space group                       | P 21/c                                            |
| Unit cell dimensions              | a = 2041.5(3) pm                                  |
|                                   | $\alpha = 90^\circ$                               |
|                                   | b = 598.06(8) pm                                  |
|                                   | $\beta = 105.234(2)^\circ$                        |
| Volume                            | c = 1539.0(2) pm                                  |
|                                   | $\gamma = 90^\circ$                               |
| Volume                            | 1.8130(4) nm <sup>3</sup>                         |
| Z                                 | 4                                                 |
| Density (calculated)              | 1.435 Mg/m <sup>3</sup>                           |
| Absorption coefficient            | 0.240 mm <sup>-1</sup>                            |
| F(000)                            | 808                                               |
| Crystal size                      | 0.260 x 0.220 x 0.210 mm <sup>3</sup>             |
| Theta range for data collection   | 2.743 to 25.999°.                                 |
| Index ranges                      | -18 ≤ h ≤ 24, -6 ≤ k ≤ 7, -18 ≤ l ≤ 18            |
| Reflections collected             | 9452                                              |
| Independent reflections           | 3540 [R(int) = 0.0243]                            |
| Completeness to theta = 25.242°   | 99.5 %                                            |
| Data / restraints / parameters    | 3540 / 0 / 253                                    |
| Goodness-of-fit on F <sup>2</sup> | 1.022                                             |
| Final R indices [I > 2σ(I)]       | R1 = 0.0385, wR2 = 0.0906                         |

|                             |                                    |
|-----------------------------|------------------------------------|
| R indices (all data)        | R1 = 0.0598, wR2 = 0.1031          |
| Largest diff. peak and hole | 0.148 and -0.319 e.Å <sup>-3</sup> |

**Table S2.** Bond lengths [pm] and angles [°] for **3f**.

|             |            |                   |            |                   |            |
|-------------|------------|-------------------|------------|-------------------|------------|
| Cl(1)-C(20) | 173.43(18) | C(19)-H(19)       | 93.00      | O(1)-C(8)-N(1)    | 125.16(16) |
| O(3)-N(1)   | 138.49(18) | C(13)-C(14)       | 93.00      | O(1)-C(8)-C(6)    | 130.82(17) |
| O(3)-C(9)   | 144.7(2)   | C(13)-H(13)       | 138.7(3)   | N(1)-C(8)-C(6)    | 104.00(14) |
| O(4)-C(16)  | 120.9(2)   | C(4)-C(3)         | 93.00      | C(1)-C(6)-C(5)    | 121.69(17) |
| O(2)-C(7)   | 120.1(2)   | C(4)-H(4)         | 93.00      | C(1)-C(6)-C(8)    | 129.81(17) |
| O(1)-C(8)   | 120.2(2)   | C(14)-H(14)       | 138.7(3)   | C(5)-C(6)-C(8)    | 108.49(15) |
| N(1)-C(8)   | 139.6(2)   | C(1)-C(2)         | 93.00      | C(19)-C(18)-C(17) | 120.90(18) |
| N(1)-C(7)   | 139.7(2)   | C(1)-H(1)         | 137.9(3)   | C(19)-C(18)-H(18) | 119.5      |
| C(10)-C(15) | 138.3(2)   | C(3)-C(2)         | 93.00      | C(17)-C(18)-H(18) | 119.5      |
| C(10)-C(11) | 138.8(2)   | C(3)-H(3)         | 93.00      | C(13)-C(12)-C(11) | 120.26(17) |
| C(10)-C(9)  | 150.4(2)   | C(2)-H(2)         | 138.7(3)   | C(13)-C(12)-H(12) | 119.9      |
| C(17)-C(22) | 138.3(3)   | C(4)-C(3)         | 110.65(12) | C(11)-C(12)-H(12) | 119.9      |
| C(17)-C(18) | 139.6(2)   | N(1)-O(3)-C(9)    | 122.39(13) | O(2)-C(7)-N(1)    | 125.47(17) |
| C(17)-C(16) | 148.5(2)   | O(3)-N(1)-C(8)    | 120.11(14) | O(2)-C(7)-C(5)    | 130.61(17) |
| C(9)-C(16)  | 153.4(2)   | O(3)-N(1)-C(7)    | 113.75(14) | N(1)-C(7)-C(5)    | 103.92(15) |
| C(9)-H(9)   | 98.00      | C(8)-N(1)-C(7)    | 119.52(16) | C(17)-C(22)-C(21) | 120.81(17) |
| C(11)-C(12) | 138.5(3)   | C(15)-C(10)-C(11) | 118.99(15) | C(17)-C(22)-H(22) | 119.6      |
| C(11)-H(11) | 93.00      | C(15)-C(10)-C(9)  | 121.41(15) | C(21)-C(22)-H(22) | 119.6      |
| C(5)-C(6)   | 138.2(2)   | C(11)-C(10)-C(9)  | 118.58(16) | C(10)-C(15)-C(14) | 120.19(18) |
| C(5)-C(4)   | 138.3(2)   | C(22)-C(17)-C(18) | 123.08(15) | C(10)-C(15)-H(15) | 119.9      |
| C(5)-C(7)   | 148.3(3)   | C(22)-C(17)-C(16) | 118.27(16) | C(14)-C(15)-H(15) | 119.9      |
| C(8)-C(6)   | 148.7(2)   | C(18)-C(17)-C(16) | 113.94(13) | C(21)-C(20)-C(19) | 121.54(17) |
| C(6)-C(1)   | 137.6(3)   | O(3)-C(9)-C(10)   | 103.17(13) | C(21)-C(20)-Cl(1) | 119.22(16) |
| C(18)-C(19) | 137.3(3)   | O(3)-C(9)-C(16)   | 109.72(13) | C(19)-C(20)-Cl(1) | 119.23(15) |
| C(18)-H(18) | 93.00      | C(10)-C(9)-C(16)  | 109.9      | C(18)-C(19)-C(20) | 119.06(17) |

|             |          |                  |            |                   |            |
|-------------|----------|------------------|------------|-------------------|------------|
| C(12)-C(13) | 137.6(3) | O(3)-C(9)-H(9)   | 109.9      | C(18)-C(19)-H(19) | 120.5      |
| C(12)-H(12) | 93.00    | C(10)-C(9)-H(9)  | 109.9      | C(20)-C(19)-H(19) | 120.5      |
| C(22)-C(21) | 138.5(3) | C(16)-C(9)-H(9)  | 121.43(15) | C(20)-C(21)-C(22) | 119.10(19) |
| C(22)-H(22) | 93.00    | O(4)-C(16)-C(17) | 119.25(15) | C(20)-C(21)-H(21) | 120.5      |
| C(15)-C(14) | 138.7(3) | O(4)-C(16)-C(9)  | 121.13(18) | C(22)-C(21)-H(21) | 120.5      |
| C(15)-H(15) | 93.00    | C(6)-C(5)-C(4)   | 109.09(15) | C(14)-C(13)-C(12) | 120.14(18) |
| C(20)-C(21) | 136.8(3) | C(6)-C(5)-C(7)   | 129.78(18) | C(14)-C(13)-H(13) | 119.9      |
| C(20)-C(19) | 137.8(3) | C(4)-C(5)-C(7)   |            |                   |            |

## 4. Compound characterizations

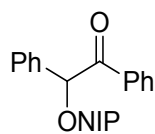

**3a**

**2-(2-oxo-1,2-diphenylethoxy)isoindoline-1,3-dione (3a)**<sup>[1]</sup>. White solid (99.6 mg, 93% yield); <sup>1</sup>H NMR (400 MHz, CDCl<sub>3</sub>) δ 8.02 (d, *J* = 7.7 Hz, 2H), 7.76 (dt, *J* = 7.3, 3.7 Hz, 2H), 7.73 – 7.66 (m, 2H), 7.62 (dd, *J* = 6.5, 2.8 Hz, 2H), 7.53 (t, *J* = 7.4 Hz, 1H), 7.42 (t, *J* = 7.7 Hz, 2H), 7.38 – 7.29 (m, 3H), 6.76 (s, 1H); <sup>13</sup>C NMR (101 MHz, CDCl<sub>3</sub>) δ 192.6, 163.1, 134.6, 134.4, 133.6, 132.5, 129.9, 129.3, 128.9, 128.8, 128.6, 128.5, 123.4, 88.2.

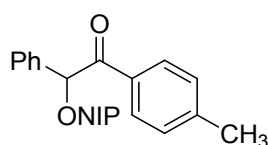

**3b**

**2-(2-oxo-1-phenyl-2-(p-tolyl)ethoxy)isoindoline-1,3-dione (3b)**. White solid (95.7 mg, 86% yield); <sup>1</sup>H NMR (400 MHz, CDCl<sub>3</sub>) δ 7.91 (d, *J* = 8.1 Hz, 2H), 7.74 (dt, *J* = 7.0, 3.6 Hz, 2H), 7.71 – 7.66 (m, 2H), 7.65 – 7.57 (m, 2H), 7.38 – 7.29 (m, 3H), 7.20 (d, *J* = 8.0 Hz, 2H), 6.74 (s, 1H), 2.35 (s, 3H); <sup>13</sup>C NMR (101 MHz, CDCl<sub>3</sub>) δ 192.2, 163.1, 144.6, 134.4, 132.8, 132.1, 129.9, 129.32, 129.27, 129.1, 128.8, 128.6, 123.4, 88.1, 21.6; HRMS (ESI-TOF): Anal. Calcd. For C<sub>23</sub>H<sub>17</sub>NO<sub>4</sub>: 394.1050, Found: 394.1051 (M+Na<sup>+</sup>).

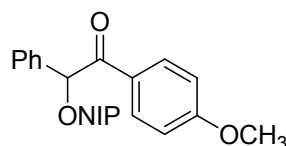

**3c**

**2-(2-(4-methoxyphenyl)-2-oxo-1-phenylethoxy)isoindoline-1,3-dione (3c)**<sup>[2]</sup>. White solid (113.8 mg, 98% yield); <sup>1</sup>H NMR (400 MHz, CDCl<sub>3</sub>) δ 8.02 (d, *J* = 8.8 Hz, 2H), 7.74 (dd, *J* = 5.2, 3.2 Hz, 2H), 7.68 (dd, *J* = 5.2, 3.2 Hz, 2H), 7.65 – 7.58 (m, 2H), 7.34 (d, *J* = 3.7 Hz, 3H), 6.87 (d, *J* = 8.8 Hz, 2H), 3.80 (s, 3H); <sup>13</sup>C NMR (101 MHz, CDCl<sub>3</sub>) δ 191.1, 163.8, 163.2, 134.4, 132.9, 131.4, 129.8, 129.2, 128.7, 128.5, 127.5, 123.4, 113.8, 88.0, 55.3.

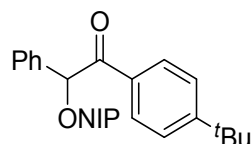

**3d**

**2-(2-(4-(tert-butyl)phenyl)-2-oxo-1-phenylethoxy)isoindoline-1,3-dione (3d)**. Yellow solid (104.1 mg, 84% yield); <sup>1</sup>H NMR (400 MHz, CDCl<sub>3</sub>) δ 7.97 (d, *J* = 8.4 Hz, 2H), 7.75 (dt, *J* = 7.3, 3.7 Hz, 2H), 7.72 – 7.67 (m, 2H), 7.66 – 7.59 (m, 2H), 7.43 (d, *J* = 8.4 Hz, 2H), 7.39 – 7.29 (m, 3H), 6.78

(s, 1H), 1.29 (s, 9H);  $^{13}\text{C}$  NMR (101 MHz,  $\text{CDCl}_3$ )  $\delta$  192.1, 163.2, 157.5, 134.4, 132.7, 132.0, 129.9, 129.4, 129.0, 128.8, 128.6, 125.6, 123.4, 88.1, 35.1, 30.9; HRMS (ESI-TOF): Anal. Calcd. For  $\text{C}_{26}\text{H}_{23}\text{NO}_4$ : 436.1519, Found: 436.1513 ( $\text{M}^+ \text{Na}^+$ ).

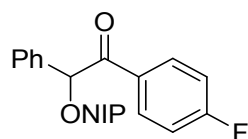

**3e**

**2-(2-(4-fluorophenyl)-2-oxo-1-phenylethoxy)isoindoline-1,3-dione (3e).** White solid (109.1 mg, 97% yield);  $^1\text{H}$  NMR (400 MHz,  $\text{CDCl}_3$ )  $\delta$  8.09 (dd,  $J = 8.5, 5.5$  Hz, 2H), 7.75 (dt,  $J = 7.0, 3.7$  Hz, 2H), 7.72 – 7.66 (m, 2H), 7.64 – 7.57 (m, 2H), 7.40 – 7.31 (m, 3H), 7.08 (t,  $J = 8.5$  Hz, 2H), 6.68 (s, 1H);  $^{19}\text{F}$  NMR (376 MHz,  $\text{CDCl}_3$ )  $\delta$  -103.44;  $^{13}\text{C}$  NMR (101 MHz,  $\text{CDCl}_3$ )  $\delta$  191.3, 165.8 (d,  $J = 247.4$  Hz), 163.1, 134.5, 132.4, 131.9 (d,  $J = 10.1$  Hz), 131.0 (d,  $J = 3.0$  Hz), 130.0, 129.2, 128.9, 128.6, 123.5, 115.8 (d,  $J = 22.2$  Hz), 88.5; HRMS (ESI-TOF): Anal. Calcd. For  $\text{C}_{22}\text{H}_{14}\text{FNO}_4$ : 398.0799, Found: 398.0790 ( $\text{M}^+ \text{Na}^+$ ).

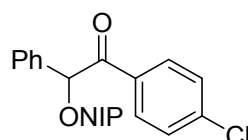

**3f**

**2-(2-(4-chlorophenyl)-2-oxo-1-phenylethoxy)isoindoline-1,3-dione (3f).** White solid (98.5 mg, 84% yield);  $^1\text{H}$  NMR (400 MHz,  $\text{CDCl}_3$ )  $\delta$  7.98 (d,  $J = 8.6$  Hz, 2H), 7.75 (dt,  $J = 7.1, 3.7$  Hz, 2H), 7.72 – 7.67 (m, 2H), 7.60 (dd,  $J = 6.5, 2.7$  Hz, 2H), 7.36 (dd,  $J = 8.8, 5.6$  Hz, 5H), 6.67 (s, 1H);  $^{13}\text{C}$  NMR (101 MHz,  $\text{CDCl}_3$ )  $\delta$  191.7, 163.1, 140.1, 134.5, 132.9, 132.3, 130.5, 130.0, 129.1, 128.9, 128.5, 123.5, 88.6; HRMS (ESI-TOF): Anal. Calcd. For  $\text{C}_{22}\text{H}_{14}\text{ClNO}_4$ : 414.0504, Found: 414.0502 ( $\text{M}^+ \text{Na}^+$ ).

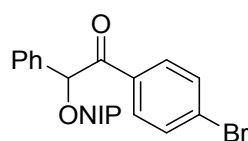

**3g**

**2-(2-(4-bromophenyl)-2-oxo-1-phenylethoxy)isoindoline-1,3-dione (3g).** White solid (109.2 mg, 95% yield);  $^1\text{H}$  NMR (400 MHz,  $\text{CDCl}_3$ )  $\delta$  7.90 (d,  $J = 8.5$  Hz, 2H), 7.75 (dt,  $J = 7.0, 3.6$  Hz, 2H), 7.72 – 7.66 (m, 2H), 7.59 (d,  $J = 3.8$  Hz, 2H), 7.54 (d,  $J = 8.5$  Hz, 2H), 7.40 – 7.31 (m, 3H), 6.66 (s, 1H);  $^{13}\text{C}$  NMR (101 MHz,  $\text{CDCl}_3$ )  $\delta$  191.9, 163.1, 134.5, 133.3, 132.3, 131.9, 130.6, 130.0, 129.1, 128.91, 128.89, 128.5, 123.5, 88.6; HRMS (ESI-TOF): Anal. Calcd. For  $\text{C}_{22}\text{H}_{14}\text{BrNO}_4$ : 436.0179, Found: 436.0176 ( $\text{M}^+ \text{H}^+$ ).



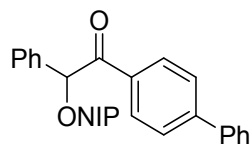

**3h**

**2-(2-((1,1'-biphenyl)-4-yl)-2-oxo-1-phenylethoxy)isoindoline-1,3-dione (3h).** White solid (119.5 mg, 92% yield);  $^1\text{H NMR}$  (400 MHz,  $\text{CDCl}_3$ )  $\delta$  8.10 (d,  $J = 8.4$  Hz, 2H), 7.76 (dt,  $J = 7.2, 3.6$  Hz, 2H), 7.73 – 7.68 (m, 2H), 7.64 (t,  $J = 7.7$  Hz, 4H), 7.57 (d,  $J = 7.3$  Hz, 2H), 7.44 (t,  $J = 7.3$  Hz, 2H), 7.37 (dd,  $J = 8.0, 4.3$  Hz, 4H), 6.78 (s, 1H);  $^{13}\text{C NMR}$  (101 MHz,  $\text{CDCl}_3$ )  $\delta$  192.3, 163.2, 146.3, 139.6, 134.5, 133.3, 132.7, 130.0, 129.7, 129.4, 128.9, 128.7, 128.3, 127.23, 127.21, 123.5, 88.4; HRMS (ESI-TOF): Anal. Calcd. For  $\text{C}_{28}\text{H}_{19}\text{NO}_4$ : 434.1387, Found: 434.1384 ( $\text{M}+\text{H}^+$ ).

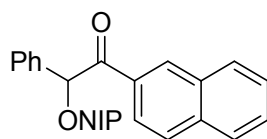

**3i**

**2-(2-(naphthalen-2-yl)-2-oxo-1-phenylethoxy)isoindoline-1,3-dione (3i).** Light yellow solid (112.3 mg, 92% yield);  $^1\text{H NMR}$  (400 MHz,  $\text{CDCl}_3$ )  $\delta$  8.62 (s, 1H), 8.05 (dd,  $J = 8.7, 1.4$  Hz, 1H), 7.93 (d,  $J = 8.1$  Hz, 1H), 7.83 (t,  $J = 8.6$  Hz, 2H), 7.76 (dt,  $J = 7.1, 3.6$  Hz, 2H), 7.72 – 7.64 (m, 4H), 7.60 – 7.49 (m, 2H), 7.36 (dd,  $J = 8.9, 3.1$  Hz, 3H), 6.91 (s, 1H);  $^{13}\text{C NMR}$  (101 MHz,  $\text{CDCl}_3$ )  $\delta$  192.7, 163.2, 135.7, 134.5, 132.7, 132.3, 132.0, 131.3, 130.0, 129.8, 129.4, 128.9, 128.7, 128.5, 127.7, 126.8, 124.3, 123.5, 88.4; HRMS (ESI-TOF): Anal. Calcd. For  $\text{C}_{26}\text{H}_{17}\text{NO}_4$ : 430.1050, Found: 430.1045 ( $\text{M}+\text{Na}^+$ ).

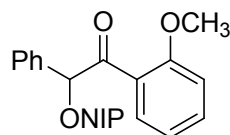

**3j**

**2-(2-(2-methoxyphenyl)-2-oxo-1-phenylethoxy)isoindoline-1,3-dione (3j).** White solid (110.3 mg, 95% yield);  $^1\text{H NMR}$  (400 MHz,  $\text{CDCl}_3$ )  $\delta$  7.78 – 7.72 (m, 3H), 7.70 – 7.64 (m, 2H), 7.56 – 7.48 (m, 2H), 7.39 (t,  $J = 7.6$  Hz, 1H), 7.33 – 7.22 (m, 3H), 6.96 – 6.88 (m, 2H), 6.83 (d,  $J = 8.4$  Hz, 1H), 3.79 (s, 3H);  $^{13}\text{C NMR}$  (101 MHz,  $\text{CDCl}_3$ )  $\delta$  194.7, 163.0, 158.0, 134.3, 134.2, 132.5, 131.0, 129.6, 129.5, 128.6, 128.3, 125.6, 123.3, 120.8, 111.4, 90.4, 55.2; HRMS (ESI-TOF): Anal. Calcd. For  $\text{C}_{23}\text{H}_{17}\text{NO}_5$ : 410.0999, Found: 410.0998 ( $\text{M}+\text{Na}^+$ ).

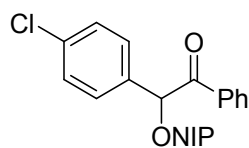

**3k**

**2-(1-(4-chlorophenyl)-2-oxo-2-phenylethoxy)isoindoline-1,3-dione (3k).** White solid (116.1 mg, 99% yield);  $^1\text{H NMR}$  (400 MHz,  $\text{CDCl}_3$ )  $\delta$  8.03 (d,  $J = 7.5$  Hz, 2H), 7.76 (dt,  $J = 6.9, 3.6$  Hz, 2H), 7.73

– 7.66 (m, 2H), 7.56 (dd,  $J = 12.9, 7.9$  Hz, 3H), 7.43 (t,  $J = 7.7$  Hz, 2H), 7.32 (d,  $J = 8.4$  Hz, 2H), 6.74 (s, 1H);  $^{13}\text{C}$  NMR (101 MHz,  $\text{CDCl}_3$ )  $\delta$  192.3, 163.1, 136.0, 134.5, 134.4, 133.8, 131.1, 130.7, 129.05, 129.03, 128.7, 128.5, 123.6, 87.3; HRMS (ESI-TOF): Anal. Calcd. For  $\text{C}_{22}\text{H}_{14}\text{ClNO}_4$ : 414.0504, Found: 414.0502 ( $\text{M}+\text{Na}^+$ ).

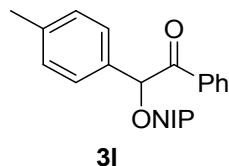

**2-(2-oxo-2-phenyl-1-(p-tolyl)ethoxy)isoindoline-1,3-dione (3l).** Light yellow solid (96.8 mg, 87% yield);  $^1\text{H}$  NMR (400 MHz,  $\text{CDCl}_3$ )  $\delta$  8.00 (d,  $J = 7.7$  Hz, 2H), 7.74 (dt,  $J = 7.4, 3.9$  Hz, 2H), 7.71 – 7.64 (m, 2H), 7.50 (t,  $J = 7.1$  Hz, 3H), 7.39 (t,  $J = 7.7$  Hz, 2H), 7.14 (d,  $J = 7.9$  Hz, 2H), 6.76 (s, 1H), 2.27 (s, 3H);  $^{13}\text{C}$  NMR (101 MHz,  $\text{CDCl}_3$ )  $\delta$  192.7, 163.2, 140.0, 134.6, 134.4, 133.5, 129.5, 129.4, 129.3, 128.9, 128.6, 128.5, 123.4, 87.9, 21.2; HRMS (ESI-TOF): Anal. Calcd. For  $\text{C}_{23}\text{H}_{17}\text{NO}_4$ : 394.1050, Found: 394.1049 ( $\text{M}+\text{Na}^+$ ).

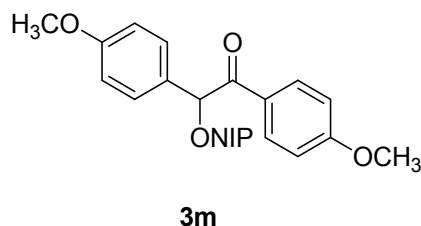

**2-(1,2-bis(4-methoxyphenyl)-2-oxoethoxy)isoindoline-1,3-dione (3m).** White solid (123.8 mg, 99% yield);  $^1\text{H}$  NMR (400 MHz,  $\text{CDCl}_3$ )  $\delta$  8.00 (d,  $J = 7.8$  Hz, 2H), 7.75 (dd,  $J = 5.5, 3.0$  Hz, 2H), 7.71 – 7.66 (m, 2H), 7.52 (d,  $J = 8.6$  Hz, 2H), 6.86 (t,  $J = 9.2$  Hz, 4H), 6.69 (s, 1H), 3.82 (d,  $J = 1.0$  Hz, 3H), 3.74 (d,  $J = 1.1$  Hz, 3H);  $^{13}\text{C}$  NMR (101 MHz,  $\text{CDCl}_3$ )  $\delta$  191.2, 163.8, 163.3, 160.7, 134.4, 131.4, 131.0, 128.6, 127.6, 124.8, 123.4, 114.2, 113.8, 87.4, 55.4, 55.1; HRMS (ESI-TOF): Anal. Calcd. For  $\text{C}_{24}\text{H}_{19}\text{NO}_6$ : 440.1105, Found: 440.1100 ( $\text{M}+\text{Na}^+$ ).

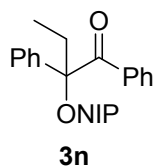

**2-((1-oxo-1,2-diphenylbutan-2-yl)oxy)isoindoline-1,3-dione (3n).** White solid (107.4 mg, 93% yield);  $^1\text{H}$  NMR (400 MHz,  $\text{CDCl}_3$ )  $\delta$  7.91 (d,  $J = 7.4$  Hz, 2H), 7.77 (dt,  $J = 7.1, 3.7$  Hz, 2H), 7.74 – 7.69 (m, 2H), 7.62 (d,  $J = 7.3$  Hz, 2H), 7.40 (dt,  $J = 14.6, 7.6$  Hz, 3H), 7.35 – 7.25 (m, 3H), 2.56 (dq,  $J = 14.7, 7.4$  Hz, 1H), 2.07 (dq,  $J = 14.5, 7.3$  Hz, 1H), 0.76 (t,  $J = 7.4$  Hz, 3H);  $^{13}\text{C}$  NMR (101 MHz,  $\text{CDCl}_3$ )  $\delta$  196.0, 164.3, 138.3, 135.8, 134.6, 132.1, 130.7, 128.8, 128.4, 128.4, 127.7, 126.5, 123.6, 95.8, 28.1, 8.4; HRMS (ESI-TOF): Anal. Calcd. For  $\text{C}_{24}\text{H}_{19}\text{NO}_4$ : 408.1206, Found: 408.1208 ( $\text{M}+\text{Na}^+$ ).

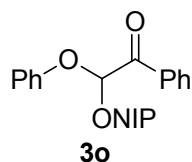

**2-((2-oxo-1-phenoxy-2-phenylethoxy)isoindoline-1,3-dione (3o).** White solid (107.5 mg, 96% yield);  $^1\text{H NMR}$  (400 MHz,  $\text{CDCl}_3$ )  $\delta$  8.31 (d,  $J = 7.5$  Hz, 2H), 7.68 (dt,  $J = 7.3, 3.7$  Hz, 2H), 7.65 – 7.59 (m, 2H), 7.55 (t,  $J = 7.4$  Hz, 1H), 7.45 (t,  $J = 7.7$  Hz, 2H), 7.20 – 7.14 (m, 2H), 7.11 (d,  $J = 7.9$  Hz, 2H), 6.95 (t,  $J = 7.2$  Hz, 1H), 6.39 (s, 1H);  $^{13}\text{C NMR}$  (101 MHz,  $\text{CDCl}_3$ )  $\delta$  189.2, 162.9, 156.3, 134.7, 134.2, 133.0, 130.2, 129.6, 128.6, 128.5, 123.8, 123.7, 117.2, 104.9; HRMS (ESI-TOF): Anal. Calcd. For  $\text{C}_{22}\text{H}_{15}\text{NO}_5$ : 396.0842, Found: 396.0843 ( $\text{M}+\text{Na}^+$ ).

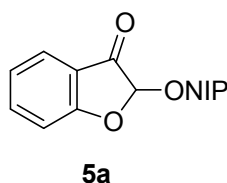

**2-((3-oxo-2,3-dihydrobenzofuran-2-yl)oxy)isoindoline-1,3-dione (5a).** White solid (79.4 mg, 67% yield);  $^1\text{H NMR}$  (400 MHz,  $\text{CDCl}_3$ )  $\delta$  7.91 – 7.85 (m, 2H), 7.83 – 7.76 (m, 2H), 7.73 – 7.65 (m, 2H), 7.21 – 7.13 (m, 2H), 5.90 (s, 1H);  $^{13}\text{C NMR}$  (101 MHz,  $\text{CDCl}_3$ )  $\delta$  191.1, 171.6, 162.6, 139.4, 134.8, 128.7, 125.3, 123.9, 123.5, 119.2, 113.6, 101.5; HRMS (ESI-TOF): Anal. Calcd. For  $\text{C}_{16}\text{H}_9\text{NO}_5$ : 318.0373, Found: 318.0369 ( $\text{M}+\text{Na}^+$ ).

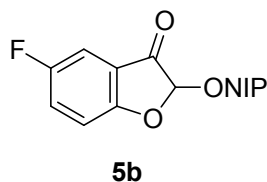

**2-((5-fluoro-3-oxo-2,3-dihydrobenzofuran-2-yl)oxy)isoindoline-1,3-dione (5b).** White solid (89.2 mg, 95% yield);  $^1\text{H NMR}$  (400 MHz,  $\text{CDCl}_3$ )  $\delta$  7.88 (dt,  $J = 7.2, 3.6$  Hz, 2H), 7.84 – 7.77 (m, 2H), 7.46 – 7.32 (m, 2H), 7.16 (dd,  $J = 8.9, 3.5$  Hz, 1H), 5.92 (s, 1H);  $^{19}\text{F NMR}$  (376 MHz,  $\text{CDCl}_3$ )  $\delta$  -118.48;  $^{13}\text{C NMR}$  (101 MHz,  $\text{CDCl}_3$ )  $\delta$  190.6 (d,  $J = 3.0$  Hz), 167.7, 162.6, 158.5 (d,  $J = 246.4$  Hz), 134.9, 128.6, 126.8 (d,  $J = 25.2$  Hz), 124.0, 119.8 (d,  $J = 8.1$  Hz), 114.9 (d,  $J = 6.1$  Hz), 110.6 (d,  $J = 24.2$  Hz), 102.3; HRMS (ESI-TOF): Anal. Calcd. For  $\text{C}_{16}\text{H}_8\text{FNO}_5$ : 336.0279, Found: 336.0273 ( $\text{M}+\text{Na}^+$ ).

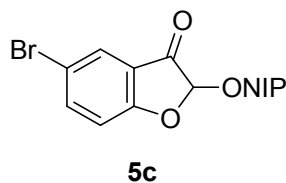

**2-((5-bromo-3-oxo-2,3-dihydrobenzofuran-2-yl)oxy)isoindoline-1,3-dione (5c).** White solid (35.8 mg, 32% yield);  $^1\text{H NMR}$  (400 MHz,  $\text{CDCl}_3$ )  $\delta$  7.89 (dd,  $J = 5.4, 3.1$  Hz, 2H), 7.83 – 7.78 (m, 3H), 7.76 (dd,  $J = 8.8, 2.1$  Hz, 1H), 7.10 (d,  $J = 8.7$  Hz, 1H), 5.92 (s, 1H);  $^{13}\text{C NMR}$  (101 MHz,  $\text{CDCl}_3$ )

$\delta$  189.8, 170.3, 162.6, 141.9, 134.9, 128.7, 127.8, 124.0, 120.9, 116.2, 115.5, 101.9; HRMS (ESI-TOF): Anal. Calcd. For  $C_{16}H_8BrNO_5$ : 373.9659, Found: 373.9654 ( $M+H^+$ ).

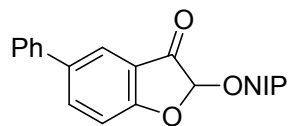

**5d**

**2-((3-oxo-5-phenyl-2,3-dihydrobenzofuran-2-yl)oxy)isoindoline-1,3-dione (5d)**. White solid (60.1 mg, 54% yield);  $^1H$  NMR (400 MHz,  $CDCl_3$ )  $\delta$  7.94 – 7.85 (m, 4H), 7.82 – 7.75 (m, 2H), 7.53 (d,  $J = 7.3$  Hz, 2H), 7.45 (t,  $J = 7.5$  Hz, 2H), 7.37 (t,  $J = 7.2$  Hz, 1H), 7.25 (d,  $J = 9.1$  Hz, 1H), 5.95 (s, 1H);  $^{13}C$  NMR (101 MHz,  $CDCl_3$ )  $\delta$  191.1, 171.0, 162.7, 139.0, 138.5, 137.2, 134.8, 129.0, 128.7, 127.8, 126.9, 124.0, 123.2, 119.7, 113.9, 102.0; HRMS (ESI-TOF): Anal. Calcd. For  $C_{22}H_{13}NO_5$ : 394.0686, Found: 394.0694 ( $M+Na^+$ ).

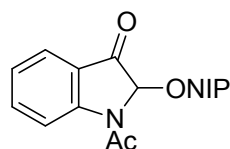

**5e**

**2-((1-acetyl-3-oxoindolin-2-yl)oxy)isoindoline-1,3-dione (5e)**. White solid (95.8 mg, 95% yield);  $^1H$  NMR (400 MHz,  $CDCl_3$ )  $\delta$  8.46 (d,  $J = 7.6$  Hz, 1H), 7.83 (dt,  $J = 7.1, 3.6$  Hz, 2H), 7.80 – 7.75 (m, 2H), 7.72 (d,  $J = 7.5$  Hz, 1H), 7.66 (t,  $J = 7.8$  Hz, 1H), 7.22 (t,  $J = 7.5$  Hz, 1H), 5.81 (s, 1H), 2.71 (s, 3H);  $^{13}C$  NMR (101 MHz,  $CDCl_3$ )  $\delta$  190.7, 169.8, 163.2, 153.2, 138.3, 134.8, 128.7, 125.0, 124.8, 124.0, 121.8, 118.2, 86.2, 23.8; HRMS (ESI-TOF): Anal. Calcd. For  $C_{18}H_{12}N_2O_5$ : 359.0638, Found: 359.0638 ( $M+Na^+$ ).

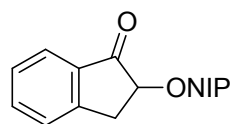

**5f**

**2-((1-oxo-2,3-dihydro-1H-inden-2-yl)oxy)isoindoline-1,3-dione (5f)**<sup>[1]</sup>. White solid (81.7 mg, 93% yield);  $^1H$  NMR (400 MHz,  $CDCl_3$ )  $\delta$  8.00 (d,  $J = 7.7$  Hz, 1H), 7.86 (dt,  $J = 7.1, 3.6$  Hz, 2H), 7.82 – 7.76 (m, 3H), 7.74 (dd,  $J = 10.9, 4.0$  Hz, 1H), 7.58 (t,  $J = 7.5$  Hz, 1H), 5.92 (dd,  $J = 6.5, 1.9$  Hz, 1H), 3.28 (dd,  $J = 19.2, 2.3$  Hz, 1H), 3.09 (dd,  $J = 19.2, 6.6$  Hz, 1H);  $^{13}C$  NMR (101 MHz,  $CDCl_3$ )  $\delta$  201.3, 163.8, 148.9, 137.5, 135.1, 134.7, 130.7, 128.7, 127.6, 123.7, 123.4, 83.6, 43.4.

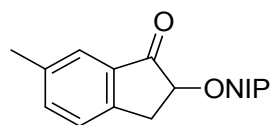

**5g**

**2-((6-methyl-1-oxo-2,3-dihydro-1H-inden-2-yl)oxy)isoindoline-1,3-dione (5g)**. White solid

(46.1 mg, 50% yield);  $^1\text{H NMR}$  (400 MHz,  $\text{CDCl}_3$ )  $\delta$  7.90 – 7.82 (m, 3H), 7.82 – 7.74 (m, 2H), 7.59 (s, 1H), 7.53 (d,  $J = 7.8$  Hz, 1H), 5.88 (d,  $J = 5.3$  Hz, 1H), 3.26 (dd,  $J = 19.2, 2.1$  Hz, 1H), 3.07 (dd,  $J = 19.2, 6.5$  Hz, 1H), 2.46 (s, 3H);  $^{13}\text{C NMR}$  (101 MHz,  $\text{CDCl}_3$ )  $\delta$  201.5, 163.9, 146.4, 141.2, 137.8, 136.3, 134.7, 128.7, 127.3, 123.7, 123.3, 83.4, 43.7, 21.4; HRMS (ESI-TOF): Anal. Calcd. For  $\text{C}_{18}\text{H}_{13}\text{NO}_4$ : 330.0737, Found: 330.0748 ( $\text{M}+\text{Na}^+$ ).

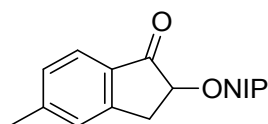

**5h**

**2-((5-methyl-1-oxo-2,3-dihydro-1H-inden-2-yl)oxy)isoindoline-1,3-dione (5h)**. Yellow solid (44.2 mg, 48% yield);  $^1\text{H NMR}$  (400 MHz,  $\text{CDCl}_3$ )  $\delta$  7.87 (dt,  $J = 7.3, 3.7$  Hz, 2H), 7.83 – 7.75 (m, 3H), 7.69 (d,  $J = 7.9$  Hz, 1H), 7.39 (d,  $J = 7.8$  Hz, 1H), 5.90 – 5.81 (m, 1H), 3.27 (dd,  $J = 19.1, 2.0$  Hz, 1H), 3.05 (dd,  $J = 19.1, 6.6$  Hz, 1H), 2.51 (s, 3H);  $^{13}\text{C NMR}$  (101 MHz,  $\text{CDCl}_3$ )  $\delta$  200.9, 163.9, 149.4, 146.6, 135.3, 134.7, 132.0, 128.8, 127.8, 123.7, 123.2, 83.7, 43.7, 22.0; HRMS (ESI-TOF): Anal. Calcd. For  $\text{C}_{18}\text{H}_{13}\text{NO}_4$ : 330.0737, Found: 330.0750 ( $\text{M}+\text{Na}^+$ ).

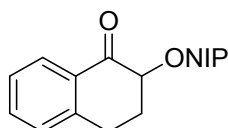

**5i**

**2-((1-oxo-1,2,3,4-tetrahydronaphthalen-2-yl)oxy)isoindoline-1,3-dione (5i)**<sup>[3]</sup>. Yellow solid (88.4 mg, 96% yield);  $^1\text{H NMR}$  (400 MHz,  $\text{CDCl}_3$ )  $\delta$  8.09 (d,  $J = 7.7$  Hz, 1H), 7.83 (dt,  $J = 7.4, 3.8$  Hz, 2H), 7.79 – 7.74 (m, 2H), 7.71 (d,  $J = 7.5$  Hz, 1H), 7.62 – 7.55 (m, 1H), 7.52 (t,  $J = 7.5$  Hz, 1H), 5.46 (s, 1H), 3.51 – 3.37 (m, 1H), 2.64 (ddt,  $J = 18.8, 13.5, 4.3$  Hz, 2H), 2.47 – 2.34 (m, 1H);  $^{13}\text{C NMR}$  (101 MHz,  $\text{CDCl}_3$ )  $\delta$  196.9, 163.9, 137.4, 134.6, 133.8, 132.4, 130.3, 130.1, 128.7, 127.1, 123.6, 82.1, 33.2, 26.9.

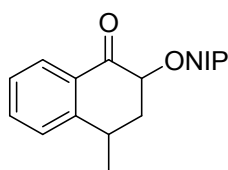

**5j**

**2-((4-methyl-1-oxo-1,2,3,4-tetrahydronaphthalen-2-yl)oxy)isoindoline-1,3-dione (5j)**. Light yellow solid (65.5 mg, 68% yield);  $^1\text{H NMR}$  (400 MHz,  $\text{CDCl}_3$ )  $\delta$  8.10 (dd,  $J = 7.8, 0.9$  Hz, 1H), 7.84 – 7.78 (m, 3H), 7.78 – 7.72 (m, 2H), 7.58 (td,  $J = 7.8, 1.3$  Hz, 1H), 7.48 (dd,  $J = 11.0, 4.1$  Hz, 1H), 3.40 (ddd,  $J = 14.5, 10.2, 5.6$  Hz, 1H), 2.76 – 2.62 (m, 2H), 2.37 (ddd,  $J = 13.2, 8.7, 5.5$  Hz, 1H), 1.87 (s, 3H);  $^{13}\text{C NMR}$  (101 MHz,  $\text{CDCl}_3$ )  $\delta$  197.2, 165.2, 141.9, 134.6, 133.6, 132.0, 129.2, 129.0, 127.2, 125.9, 123.6, 85.4, 34.7, 25.3; HRMS (ESI-TOF): Anal. Calcd. For  $\text{C}_{19}\text{H}_{15}\text{NO}_4$ : 344.0893, Found: 344.0885 ( $\text{M}+\text{Na}^+$ ).

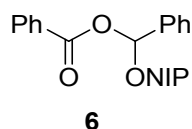

**((1,3-dioxoisindolin-2-yl)oxy)(phenyl)methyl benzoate (6)**<sup>[3]</sup>. White solid (95.1 mg, 85% yield); <sup>1</sup>H NMR (400 MHz, CDCl<sub>3</sub>) δ 8.15 (d, *J* = 5.1 Hz, 2H), 7.82 (d, *J* = 13.4 Hz, 4H), 7.71 (s, 2H), 7.56 (d, *J* = 13.1 Hz, 2H), 7.47 (s, 5H); <sup>13</sup>C NMR (101 MHz, CDCl<sub>3</sub>) δ 165.3, 163.0, 134.5, 133.8, 133.2, 130.3, 130.2, 128.8, 128.7, 128.6, 128.5, 127.2, 123.7, 100.4.

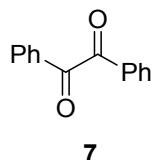

**benzil (7)**. Yellow solid (59.0 mg, 93% yield); <sup>1</sup>H NMR (400 MHz, CDCl<sub>3</sub>) δ 8.00 – 7.92 (m, 4H), 7.65 (t, *J* = 7.4 Hz, 2H), 7.50 (t, *J* = 7.8 Hz, 4H); <sup>13</sup>C NMR (101 MHz, CDCl<sub>3</sub>) δ 194.5, 134.8, 132.9, 129.8, 129.0.

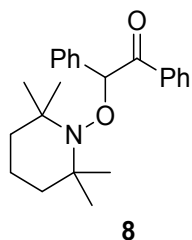

**1,2-diphenyl-2-((2,2,6,6-tetramethylpiperidin-1-yl)oxy)ethanone (8)**<sup>[4]</sup>. Colorless liquid (21.1 mg, 20% yield); <sup>1</sup>H NMR (400 MHz, CDCl<sub>3</sub>) δ 8.00 (d, *J* = 7.5 Hz, 2H), 7.41 (t, *J* = 8.5 Hz, 3H), 7.32 (t, *J* = 7.6 Hz, 2H), 7.19 (dd, *J* = 12.8, 5.1 Hz, 2H), 7.11 (t, *J* = 7.3 Hz, 1H), 5.92 (s, 1H), 1.46 (d, *J* = 12.6 Hz, 1H), 1.37 (d, *J* = 4.3 Hz, 4H), 1.11 (s, 6H), 0.92 (s, 3H), 0.73 (s, 3H); <sup>13</sup>C NMR (101 MHz, CDCl<sub>3</sub>) δ 198.3, 137.8, 135.2, 132.9, 129.3, 128.3, 127.5, 127.2, 93.2, 60.0, 59.8, 40.2, 33.6, 33.3, 31.4, 20.3, 20.2, 17.0.

## 5. Reference

- [1] A. A. Andia, M. R. Miner, K. A. Woerpel, *Org. Lett.* 2015, **17**, 2704-2707.
- [2] J.-z. Zhang, Y. Tang, *Adv. Synth. Catal.* 2016, **358**, 752-764.
- [3] R. Bag, D. Sar, T. Punniyamurthy, *Org. Lett.* 2015, **17**, 2010-2013.
- [4] J. Jayram, B. A. Xulu, V. Jeena, *Tetrahedron* 2019, **75**, 130617.

## 6. Spectroscopic data for products

$^1\text{H}$  NMR (400MHz,  $\text{CDCl}_3$ ) spectra of **3a**

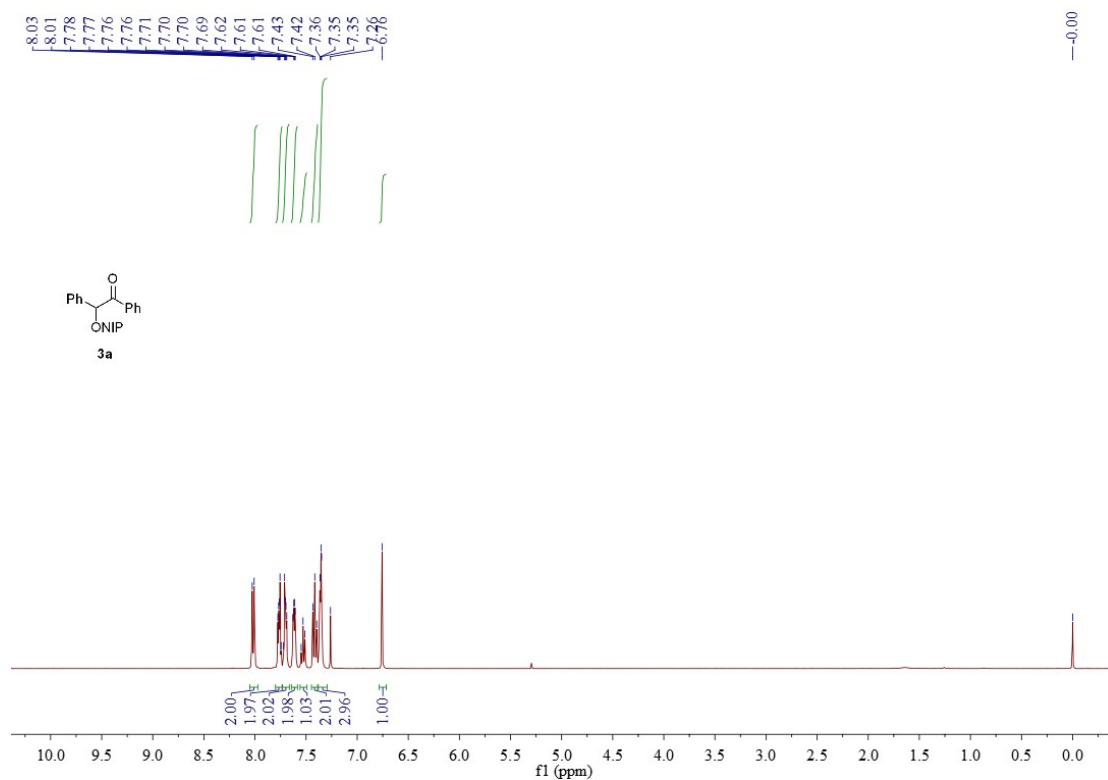

$^{13}\text{C}$  NMR (101MHz,  $\text{CDCl}_3$ ) spectra of **3a**

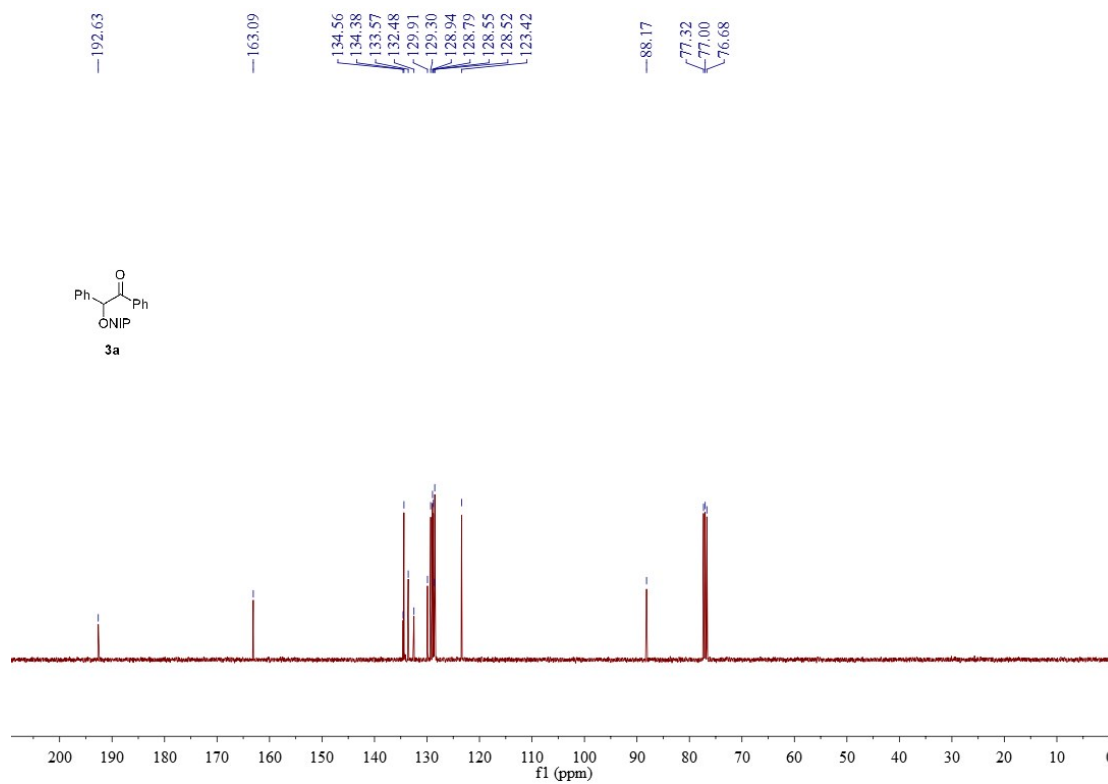

<sup>1</sup>H NMR (400MHz, CDCl<sub>3</sub>) spectra of **3b**

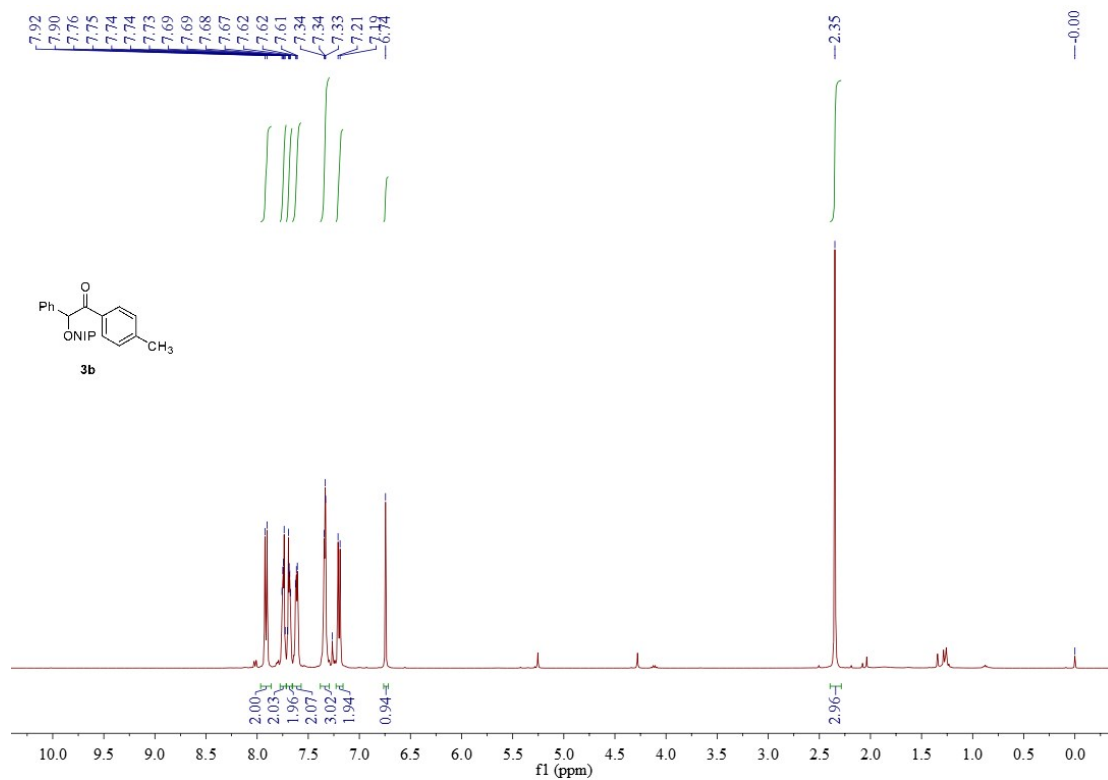

<sup>13</sup>C NMR (101MHz, CDCl<sub>3</sub>) spectra of **3b**

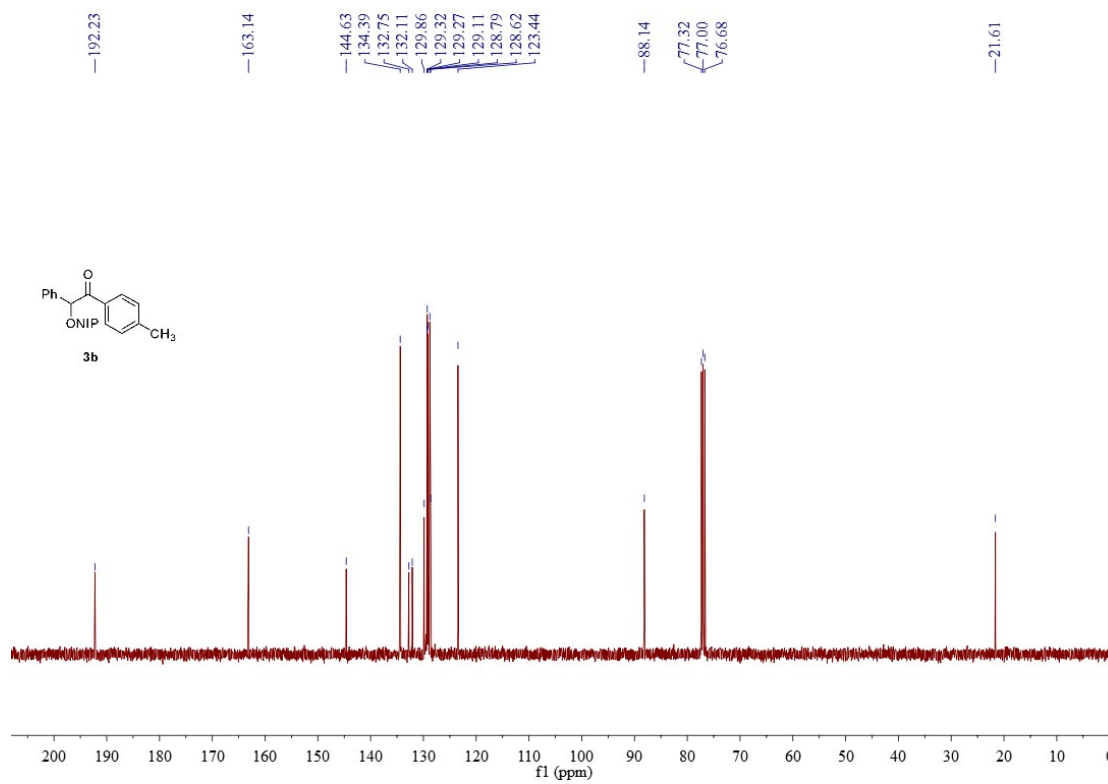



<sup>1</sup>H NMR (400MHz, CDCl<sub>3</sub>) spectra of **3c**

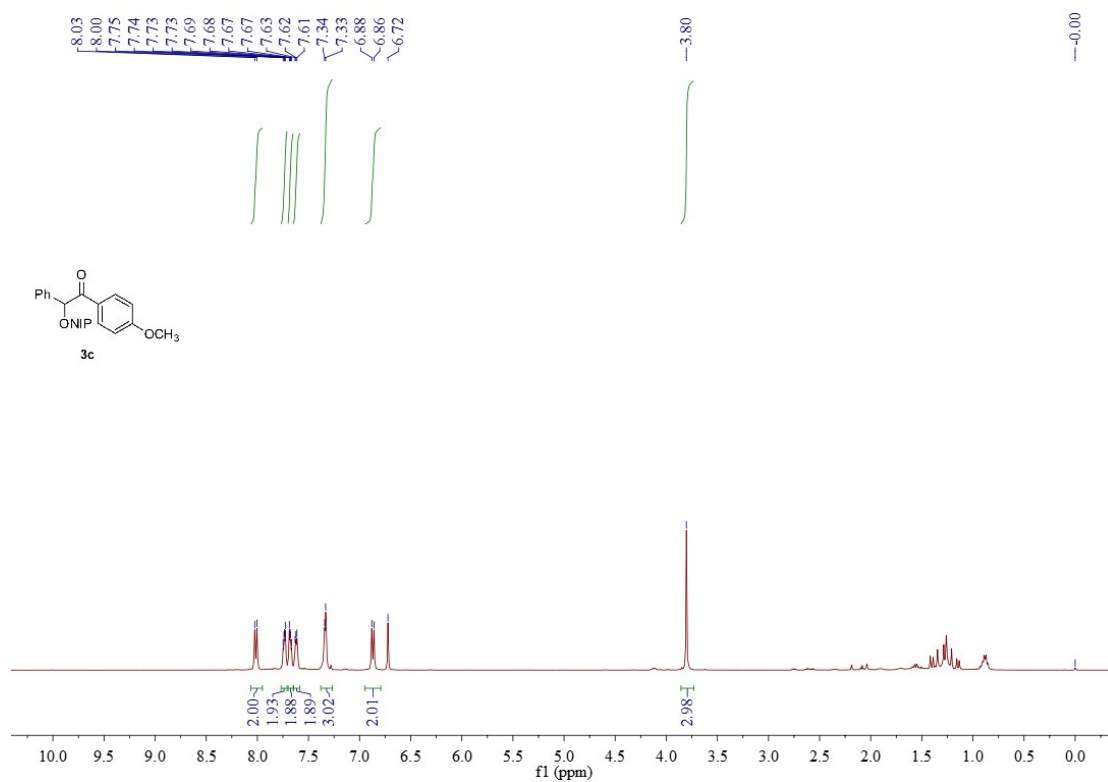

<sup>13</sup>C NMR (101MHz, CDCl<sub>3</sub>) spectra of **3c**

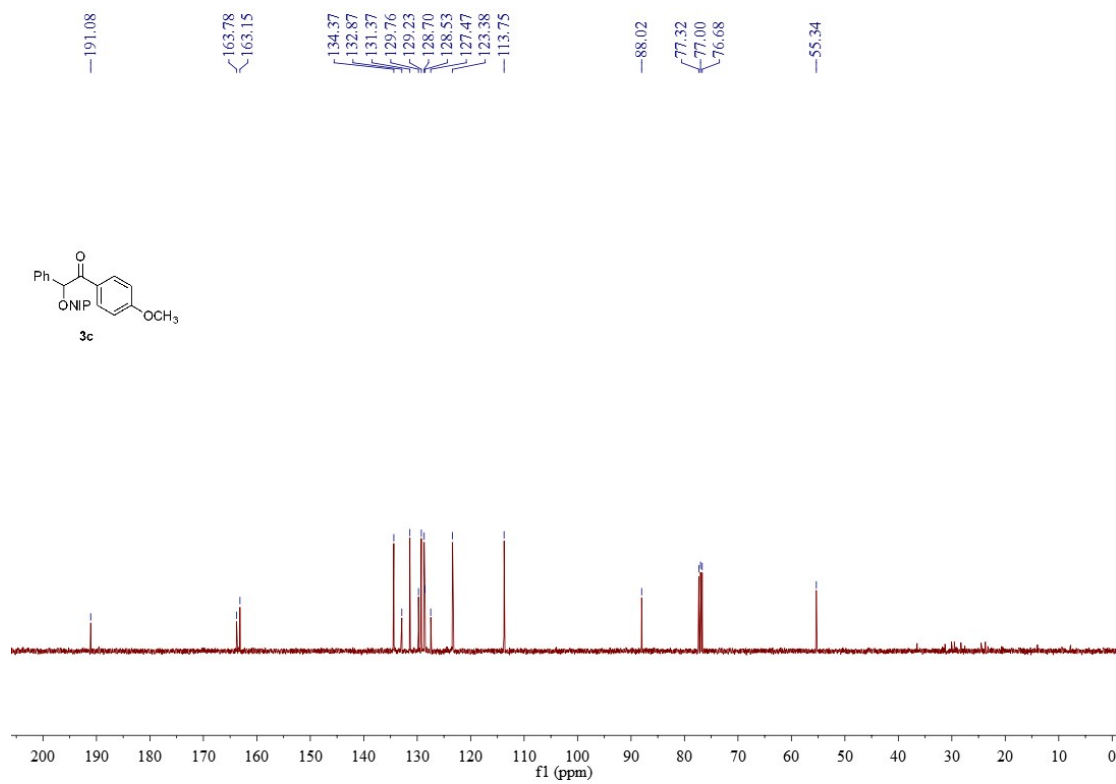

<sup>1</sup>H NMR (400MHz, CDCl<sub>3</sub>) spectra of **3d**

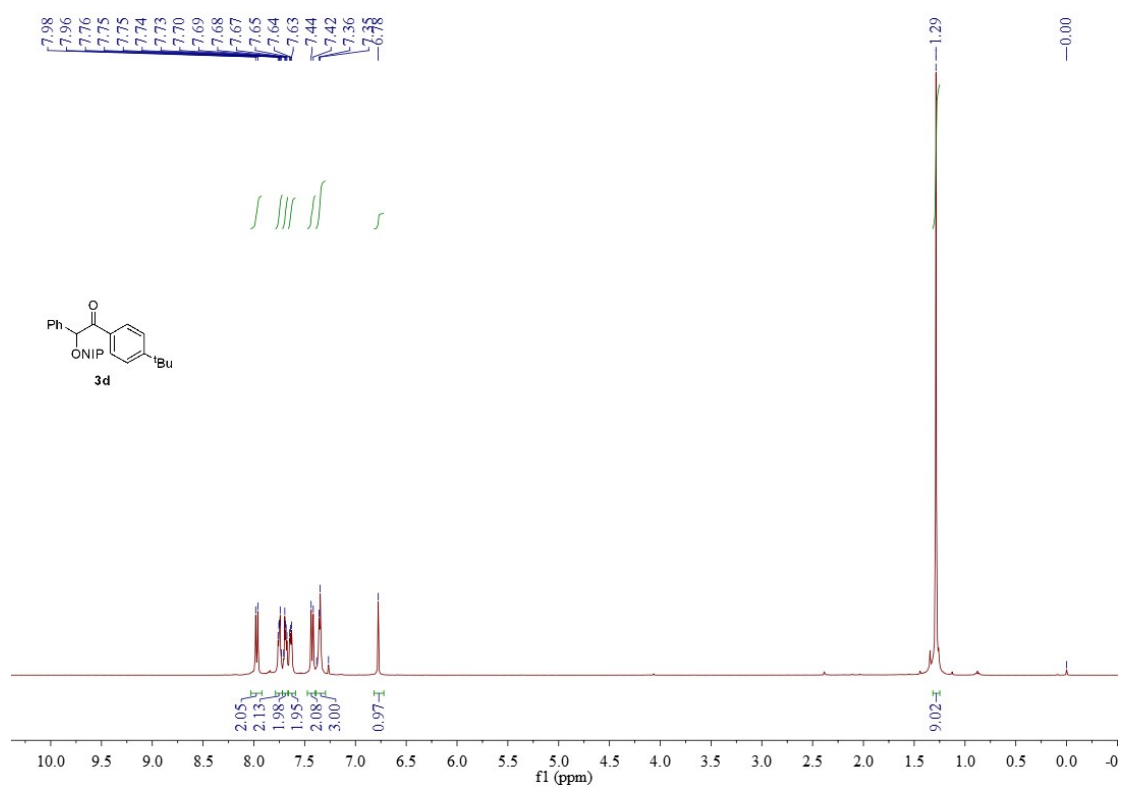

<sup>13</sup>C NMR (101MHz, CDCl<sub>3</sub>) spectra of **3d**

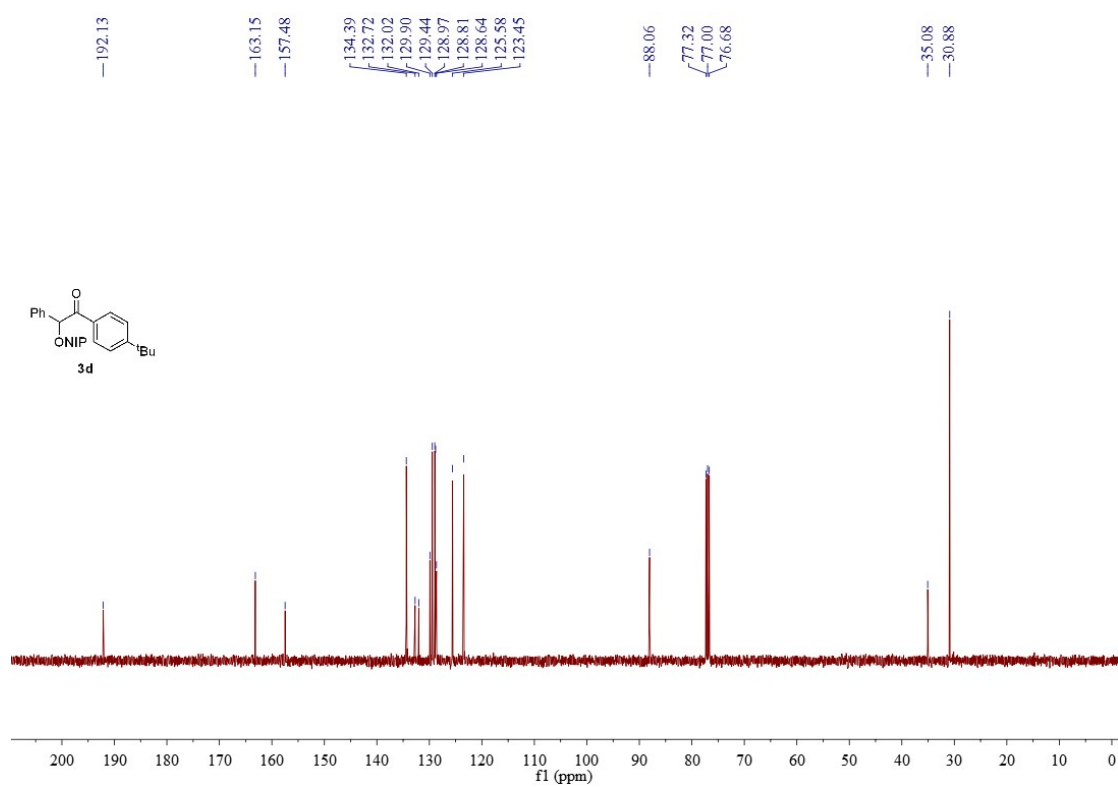

$^1\text{H}$  NMR (400MHz,  $\text{CDCl}_3$ ) spectra of **3e**

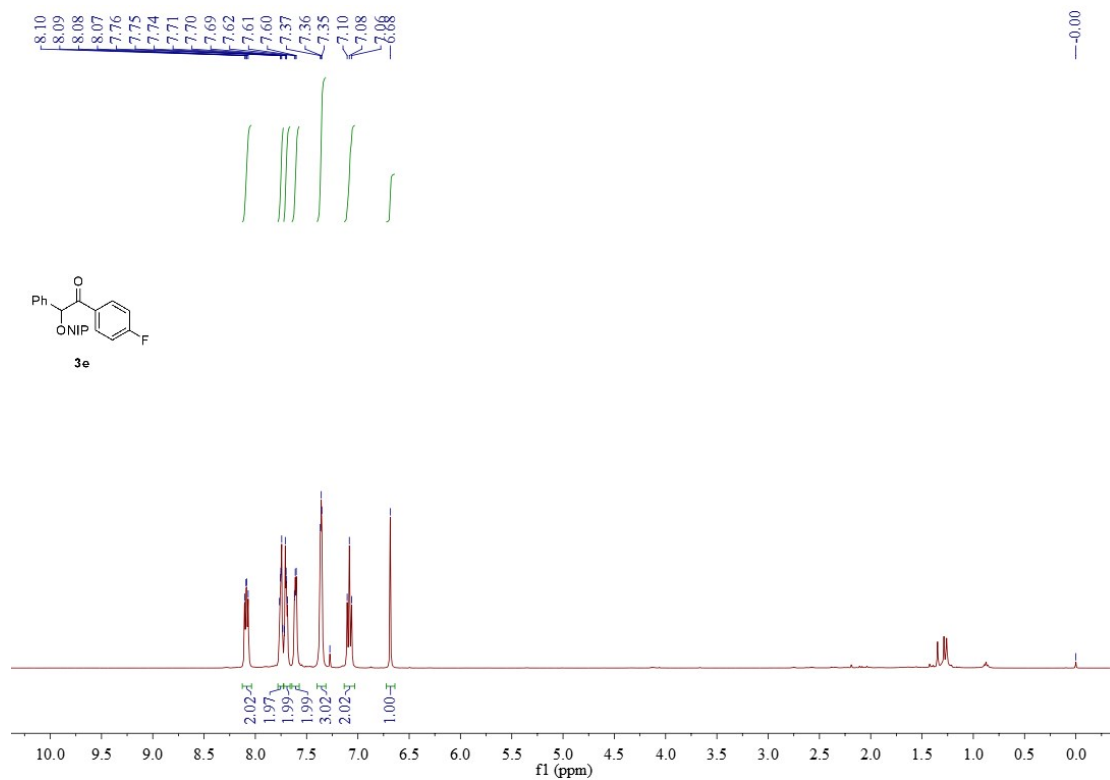

$^{19}\text{F}$  NMR (376 MHz,  $\text{CDCl}_3$ ) spectra of **3e**

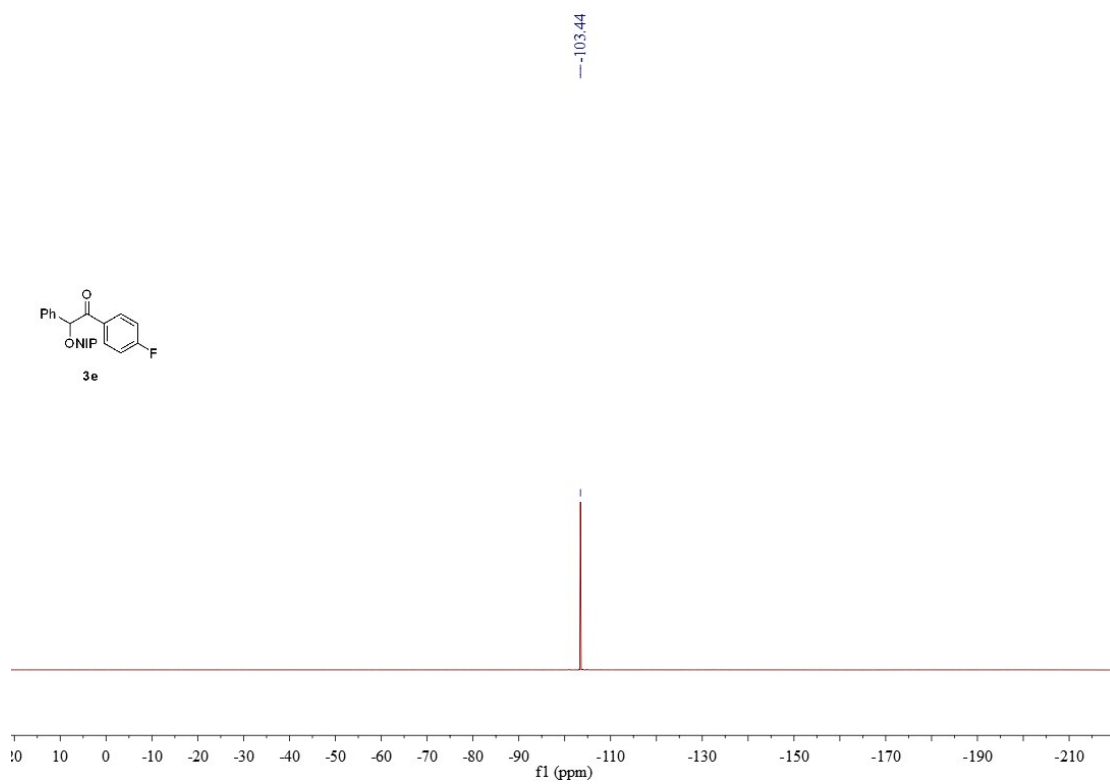

$^{13}\text{C}$  NMR (101MHz,  $\text{CDCl}_3$ ) spectra of **3e**

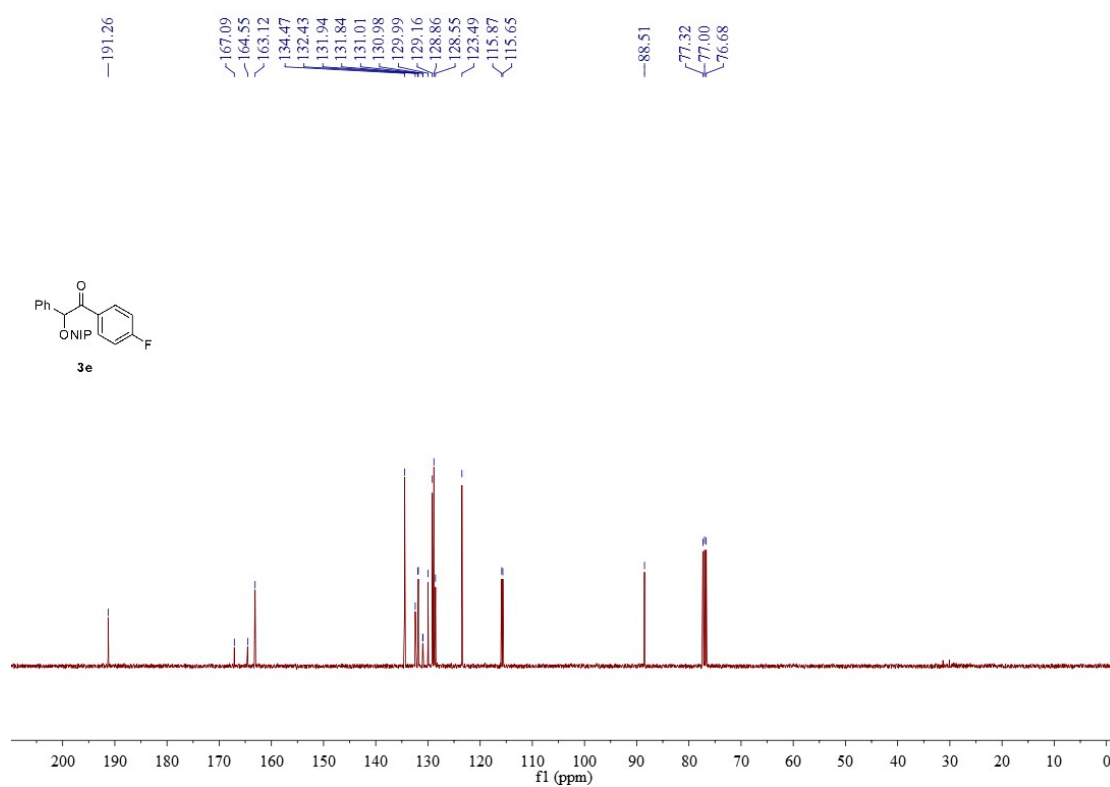

$^1\text{H}$  NMR (400MHz,  $\text{CDCl}_3$ ) spectra of **3f**

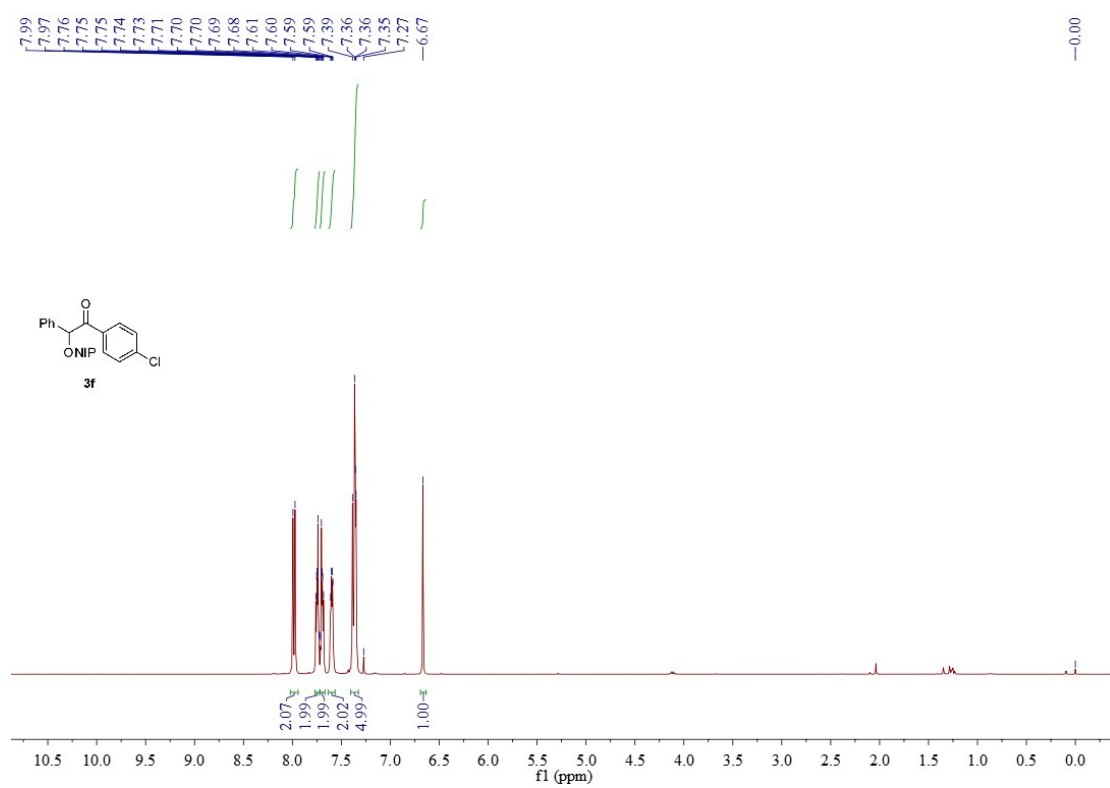

$^{13}\text{C}$  NMR (101MHz,  $\text{CDCl}_3$ ) spectra of **3f**

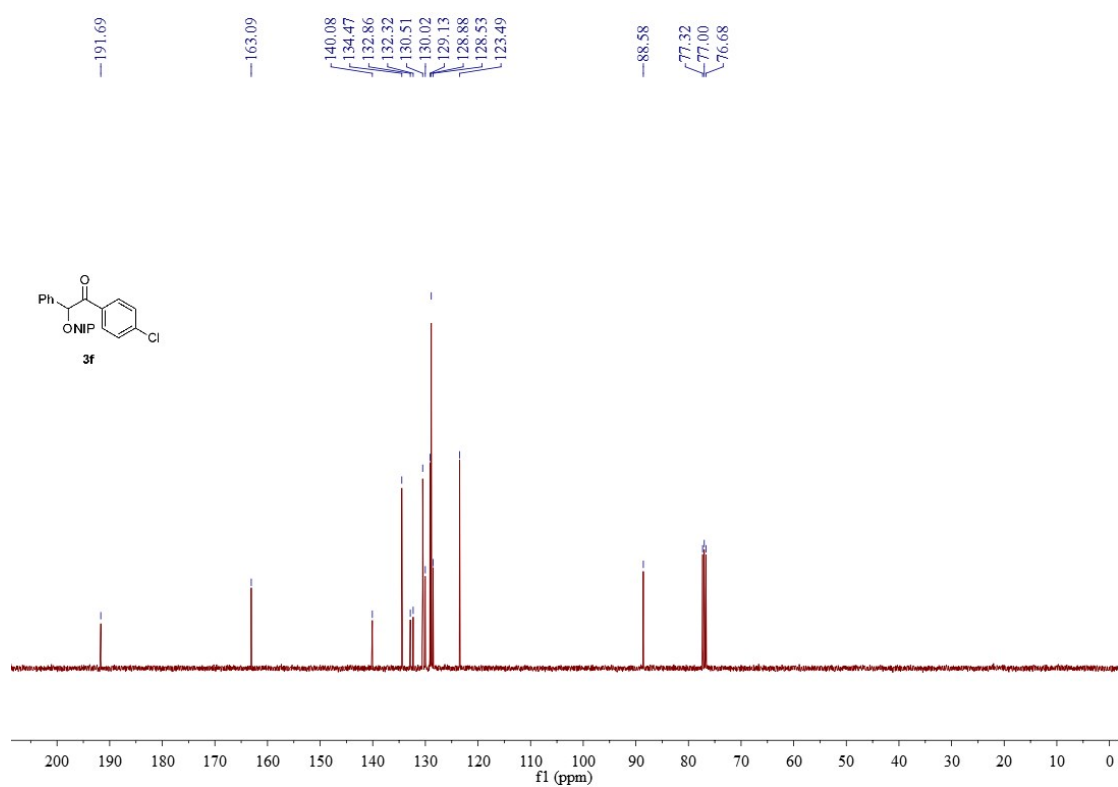

$^1\text{H}$  NMR (400MHz,  $\text{CDCl}_3$ ) spectra of **3g**

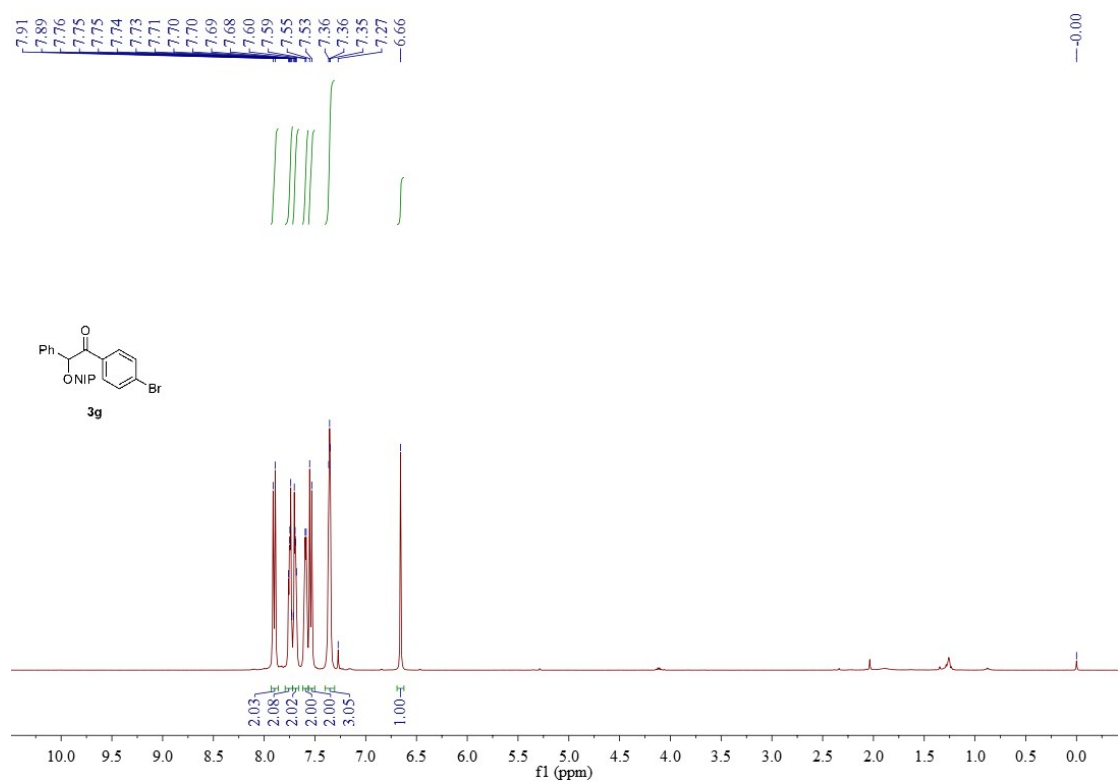

$^{13}\text{C}$  NMR (101MHz,  $\text{CDCl}_3$ ) spectra of **3g**

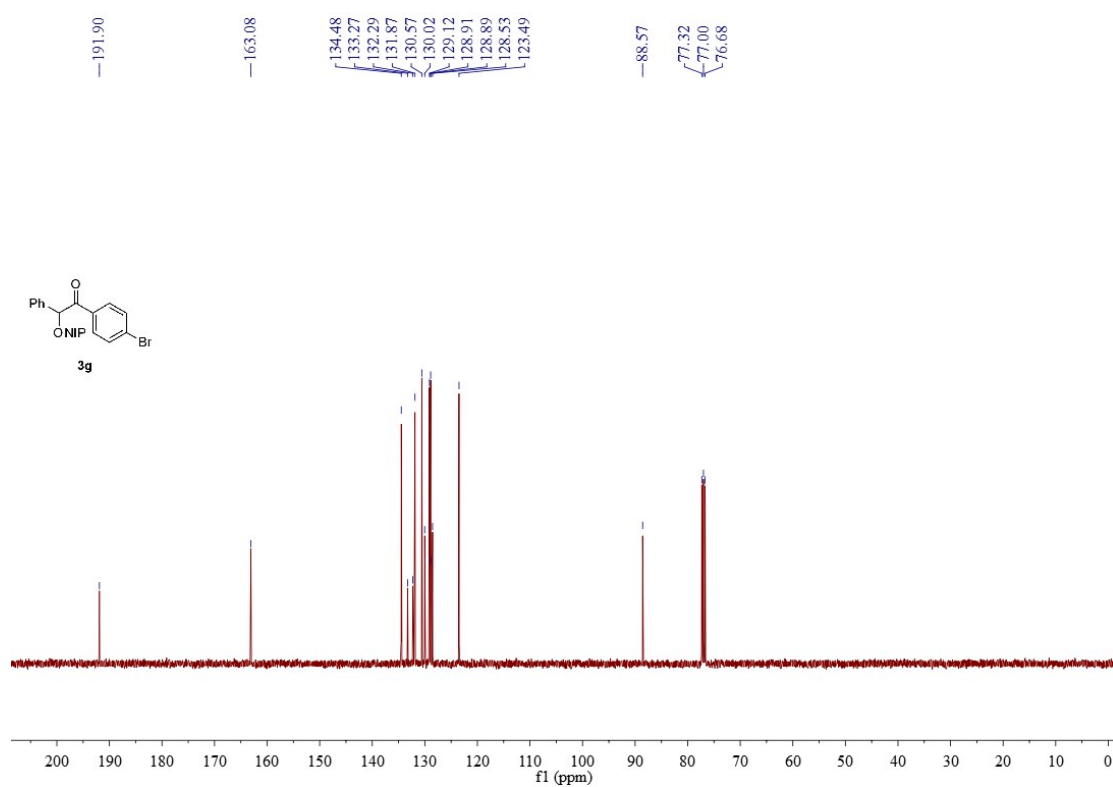

$^1\text{H}$  NMR (400MHz,  $\text{CDCl}_3$ ) spectra of **3h**

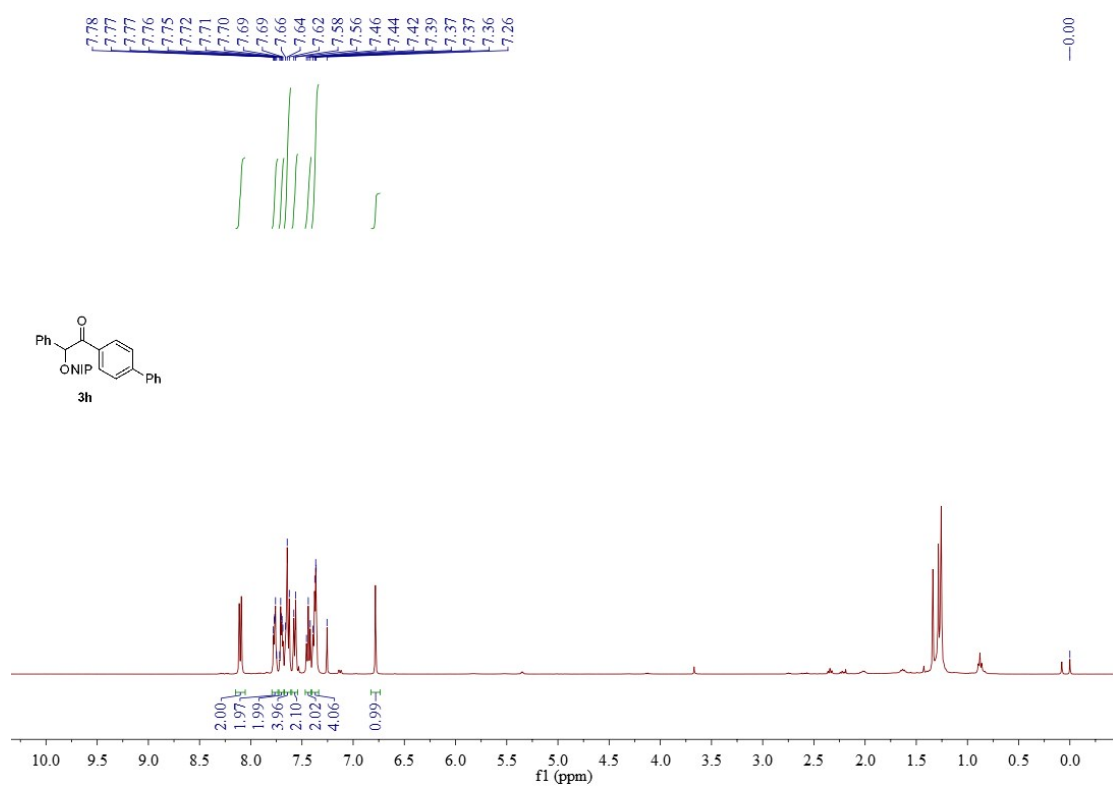

$^{13}\text{C}$  NMR (101MHz,  $\text{CDCl}_3$ ) spectra of **3h**

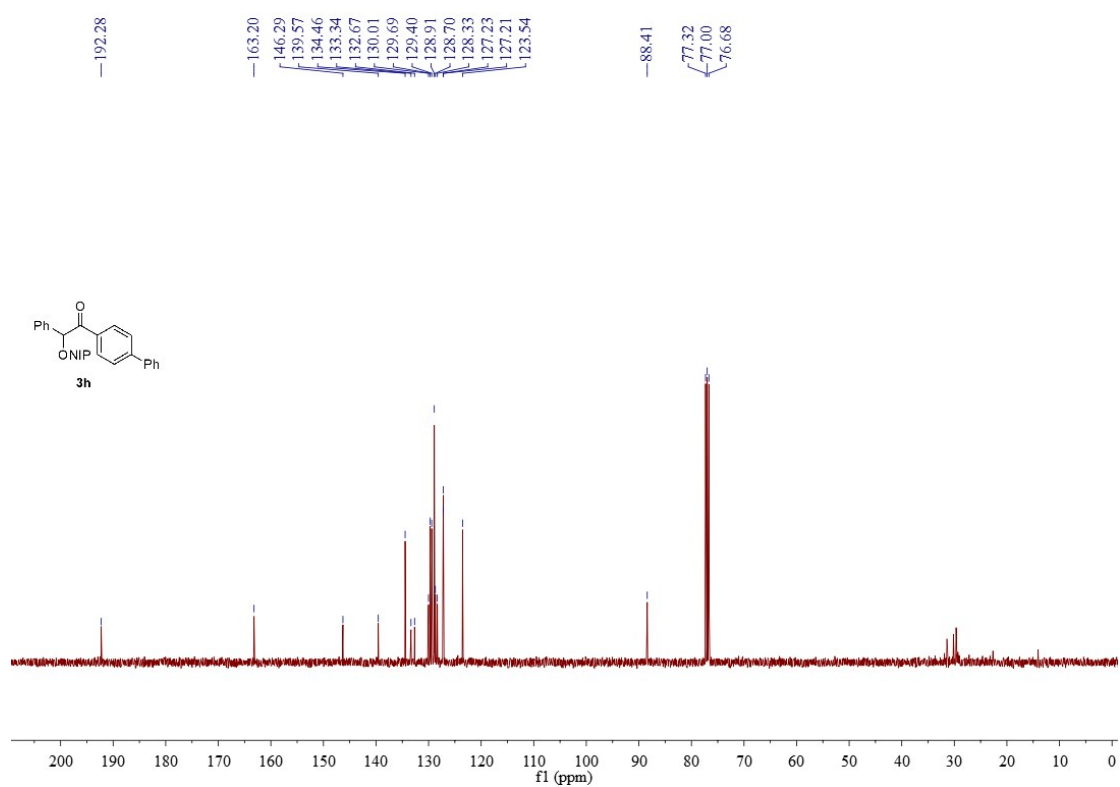

$^1\text{H}$  NMR (400MHz,  $\text{CDCl}_3$ ) spectra of **3i**

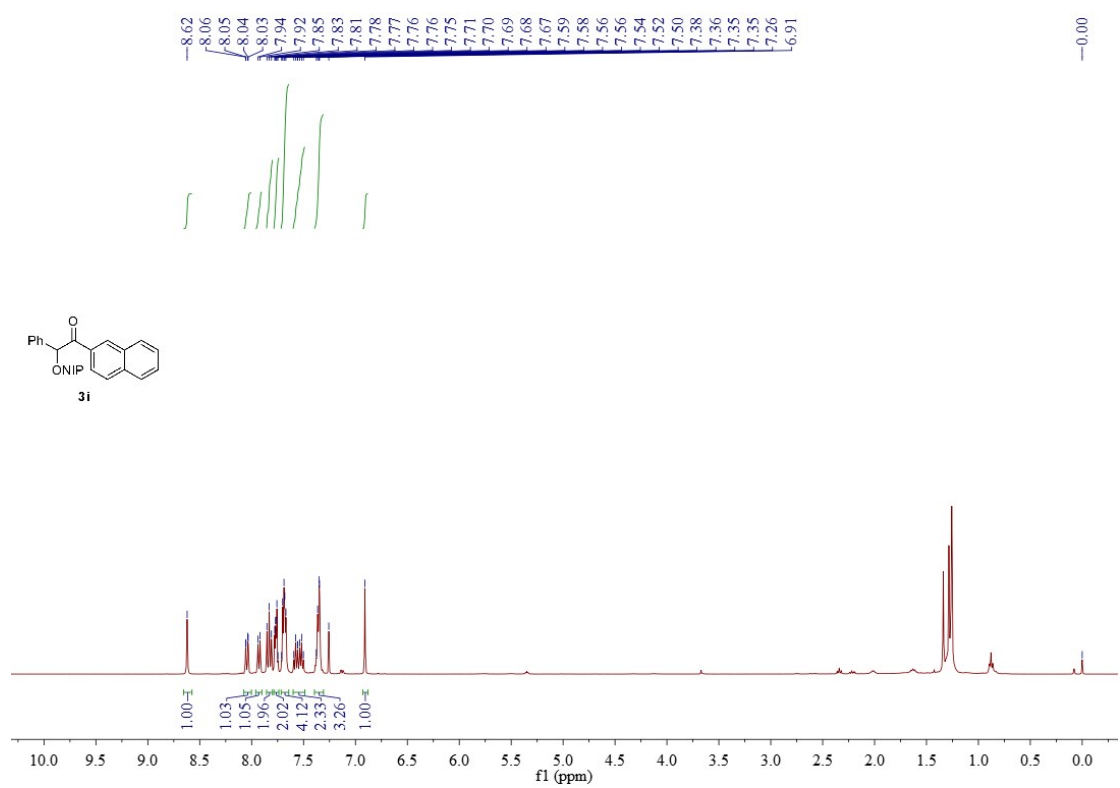

<sup>13</sup>C NMR (101MHz, CDCl<sub>3</sub>) spectra of **3i**

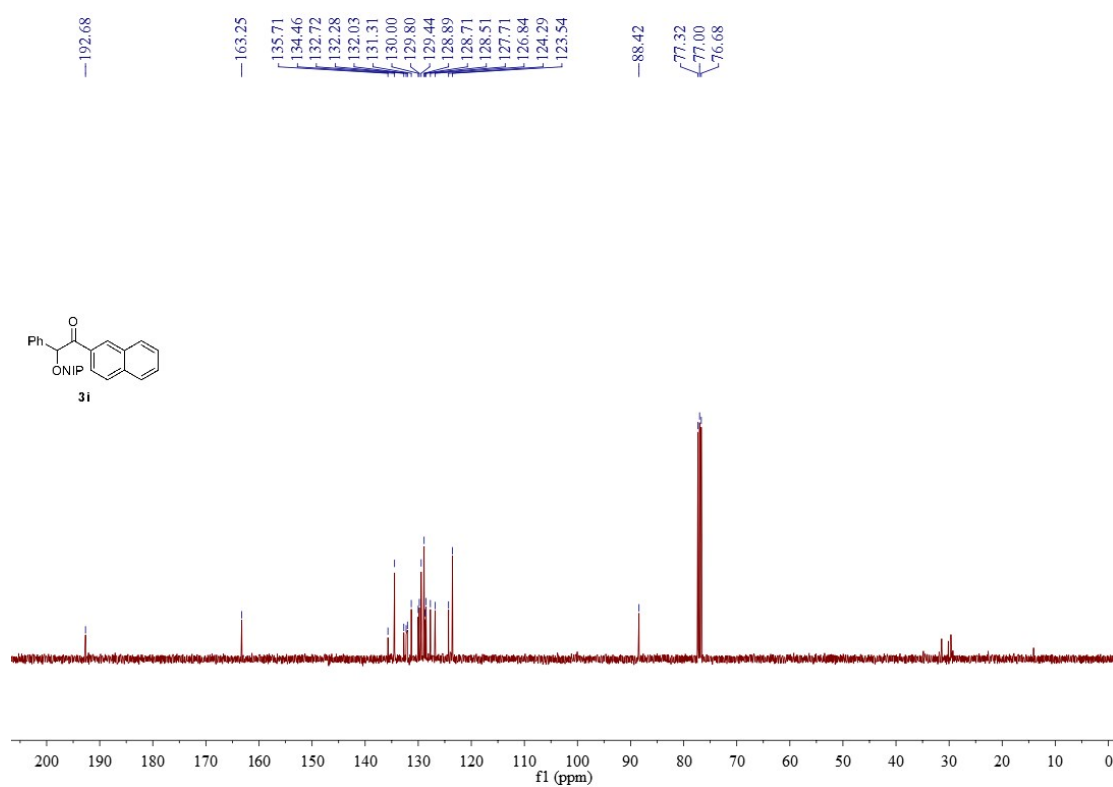

<sup>1</sup>H NMR (400MHz, CDCl<sub>3</sub>) spectra of **3j**

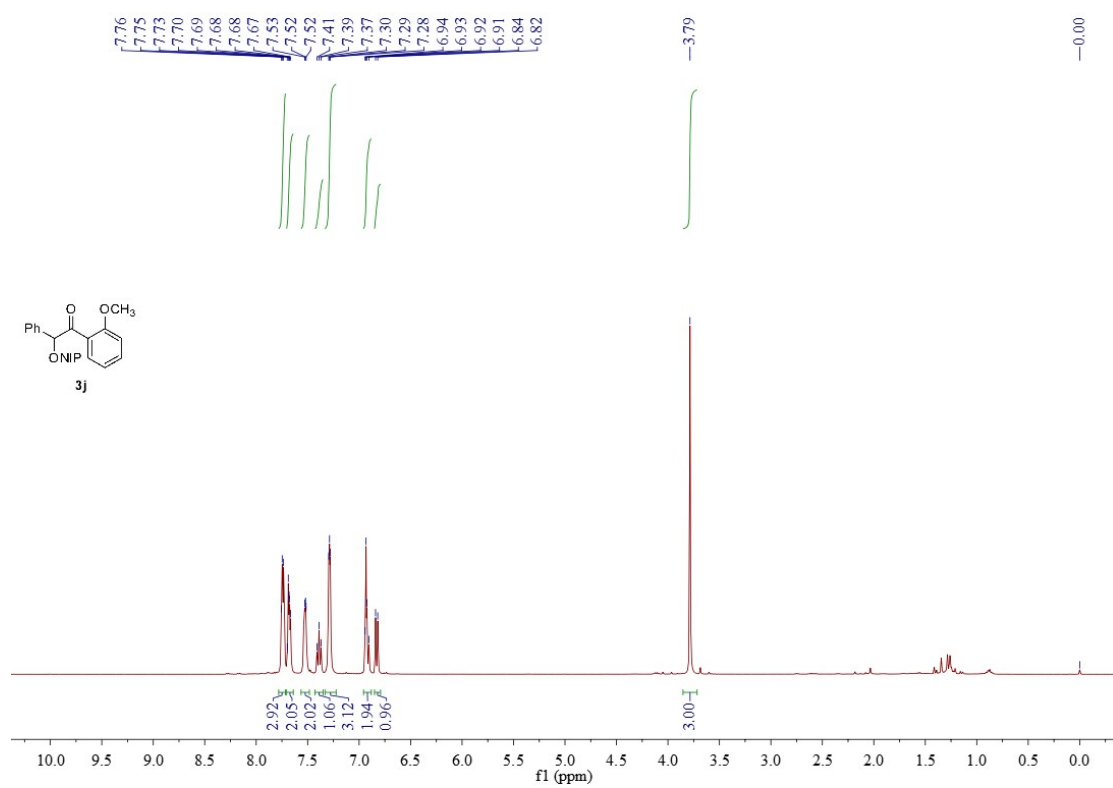



$^{13}\text{C}$  NMR (101MHz,  $\text{CDCl}_3$ ) spectra of **3j**

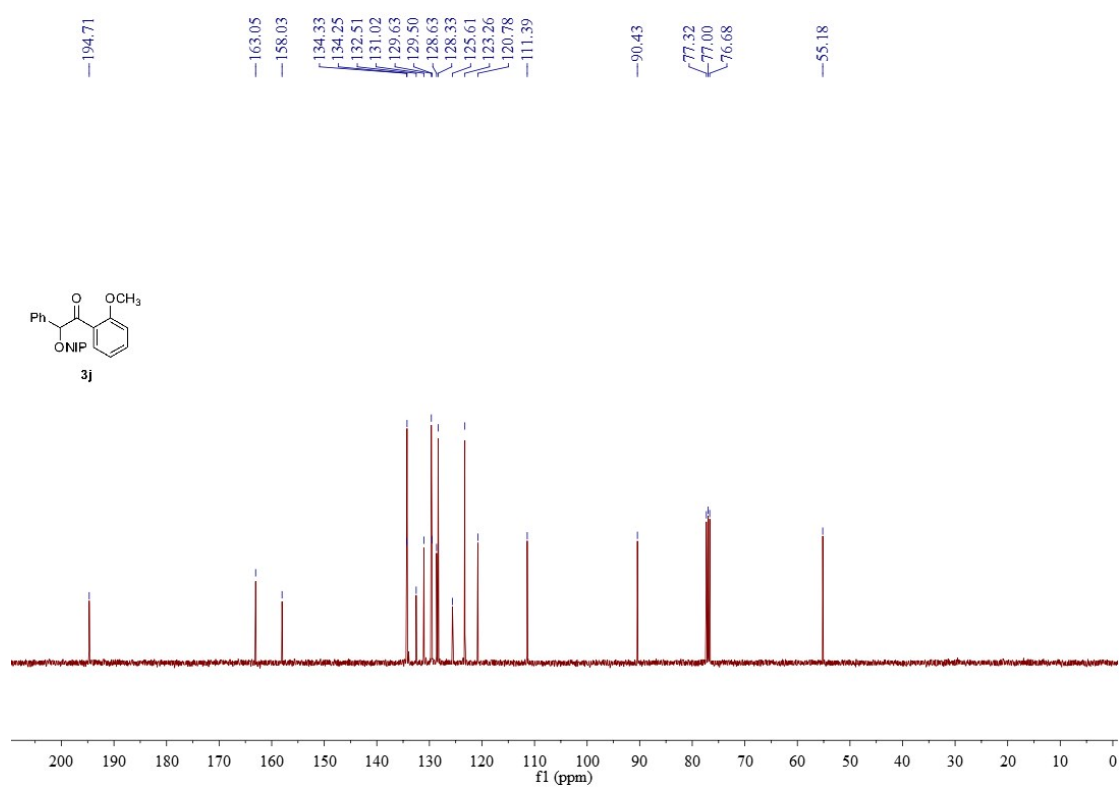

$^1\text{H}$  NMR (400MHz,  $\text{CDCl}_3$ ) spectra of **3k**

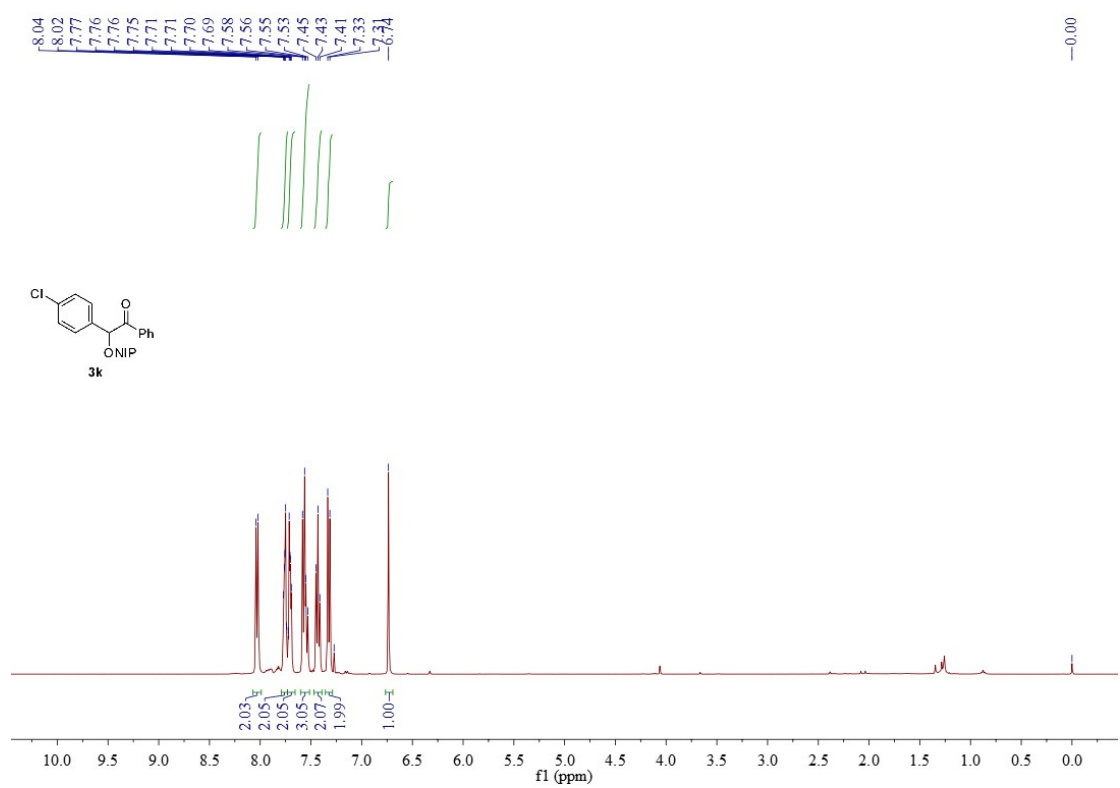

$^{13}\text{C}$  NMR (101MHz,  $\text{CDCl}_3$ ) spectra of **3k**

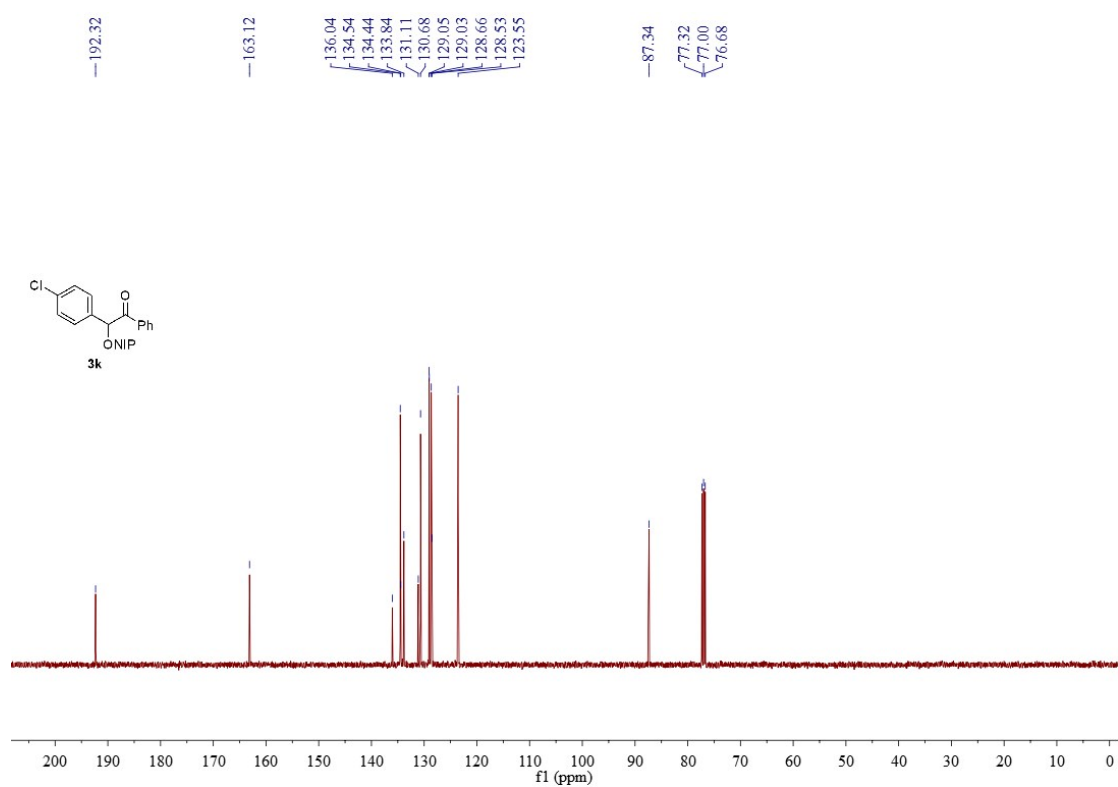

$^1\text{H}$  NMR (400MHz,  $\text{CDCl}_3$ ) spectra of **3l**

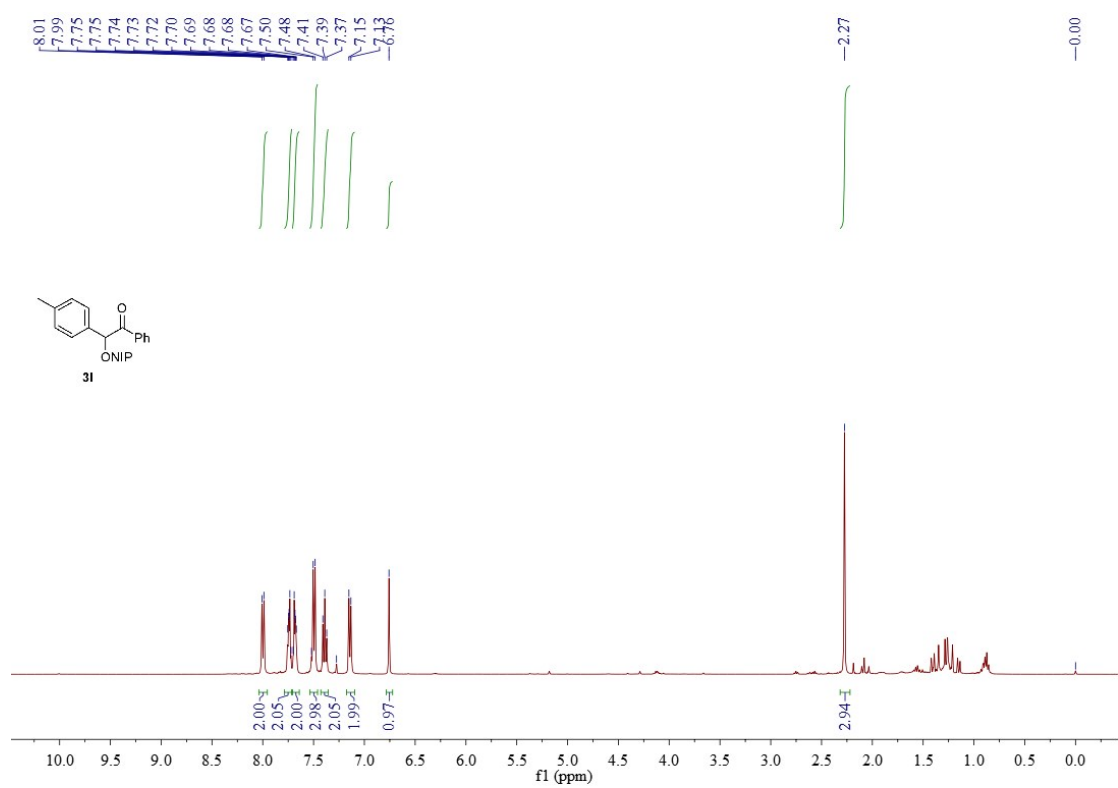

$^{13}\text{C}$  NMR (101MHz,  $\text{CDCl}_3$ ) spectra of **31**

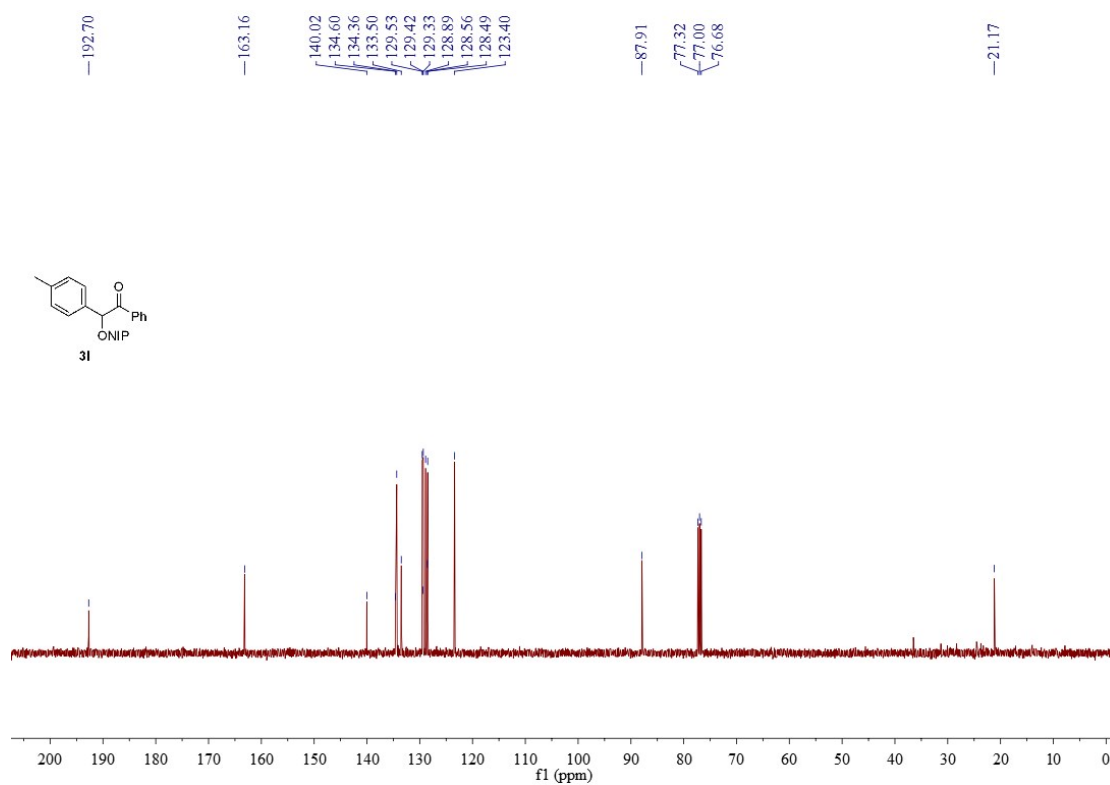

$^1\text{H}$  NMR (400MHz,  $\text{CDCl}_3$ ) spectra of **3m**

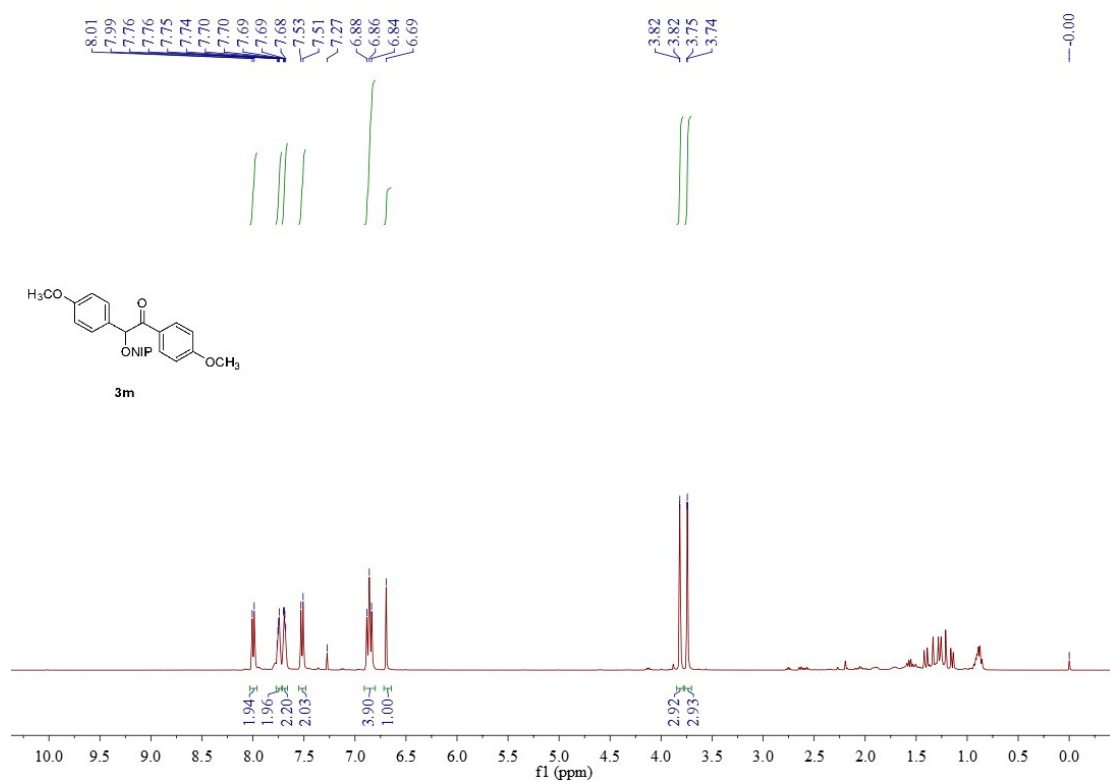

$^{13}\text{C}$  NMR (101MHz,  $\text{CDCl}_3$ ) spectra of **3m**

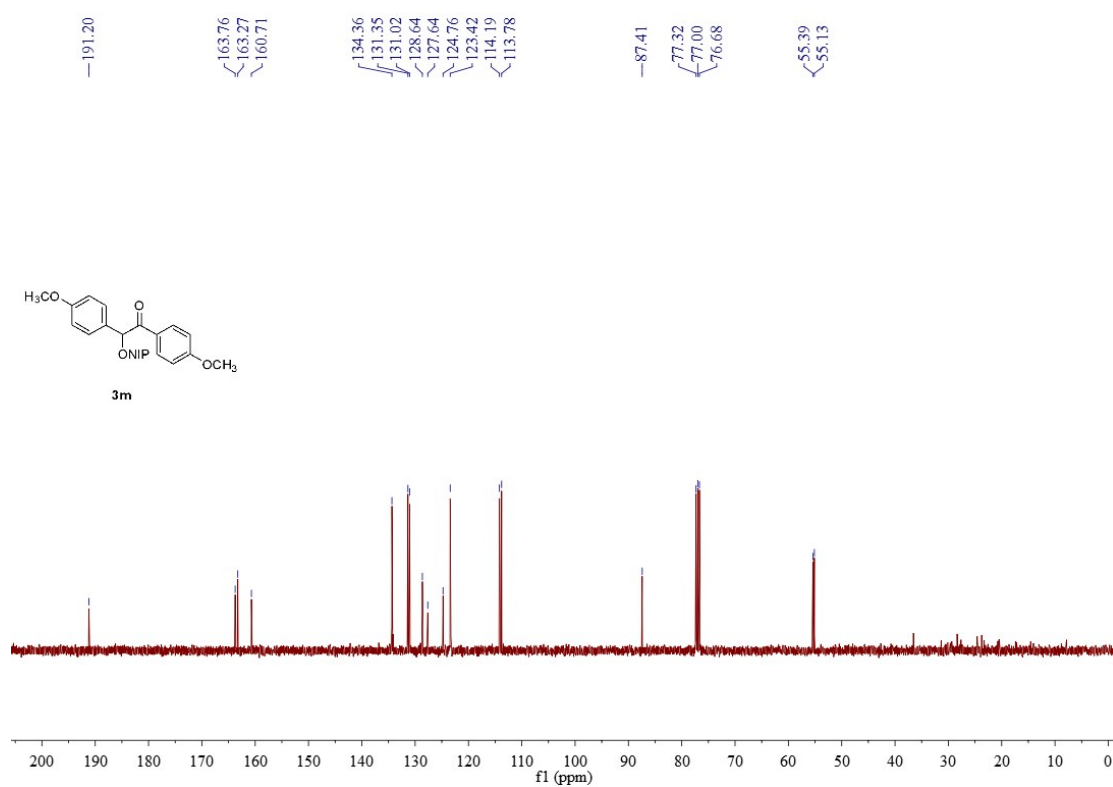

$^1\text{H}$  NMR (400MHz,  $\text{CDCl}_3$ ) spectra of **3n**

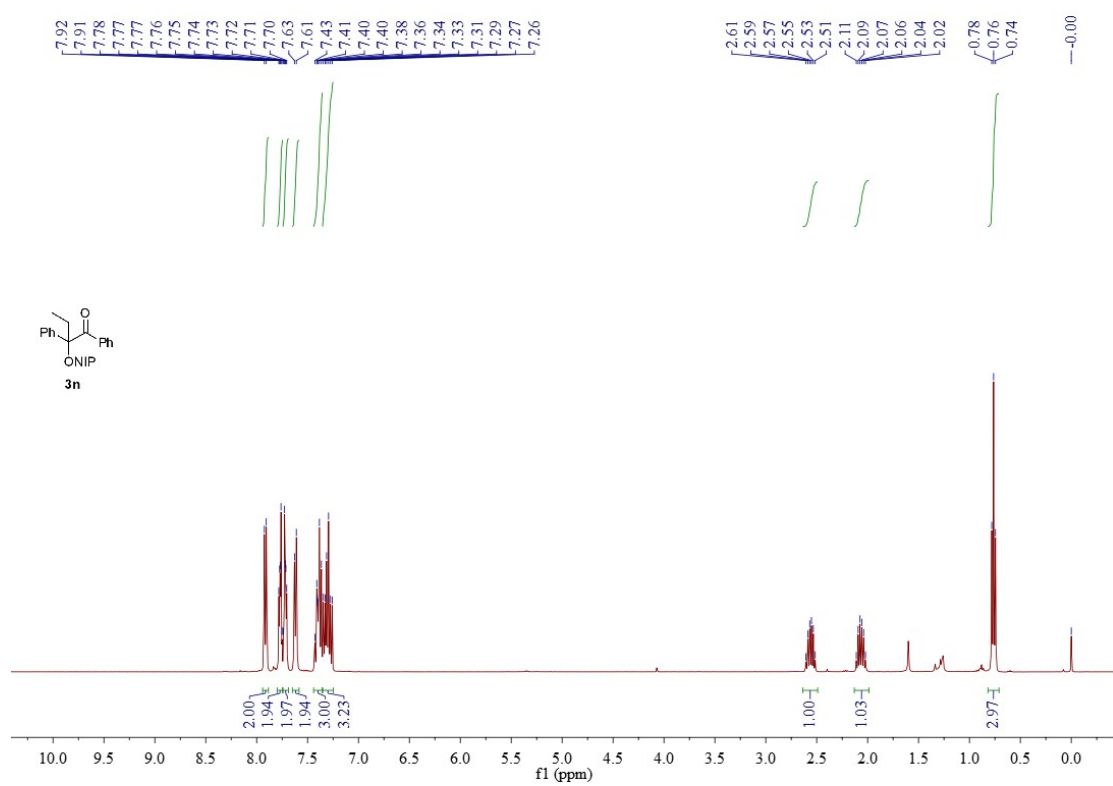

$^{13}\text{C}$  NMR (101MHz,  $\text{CDCl}_3$ ) spectra of **3n**

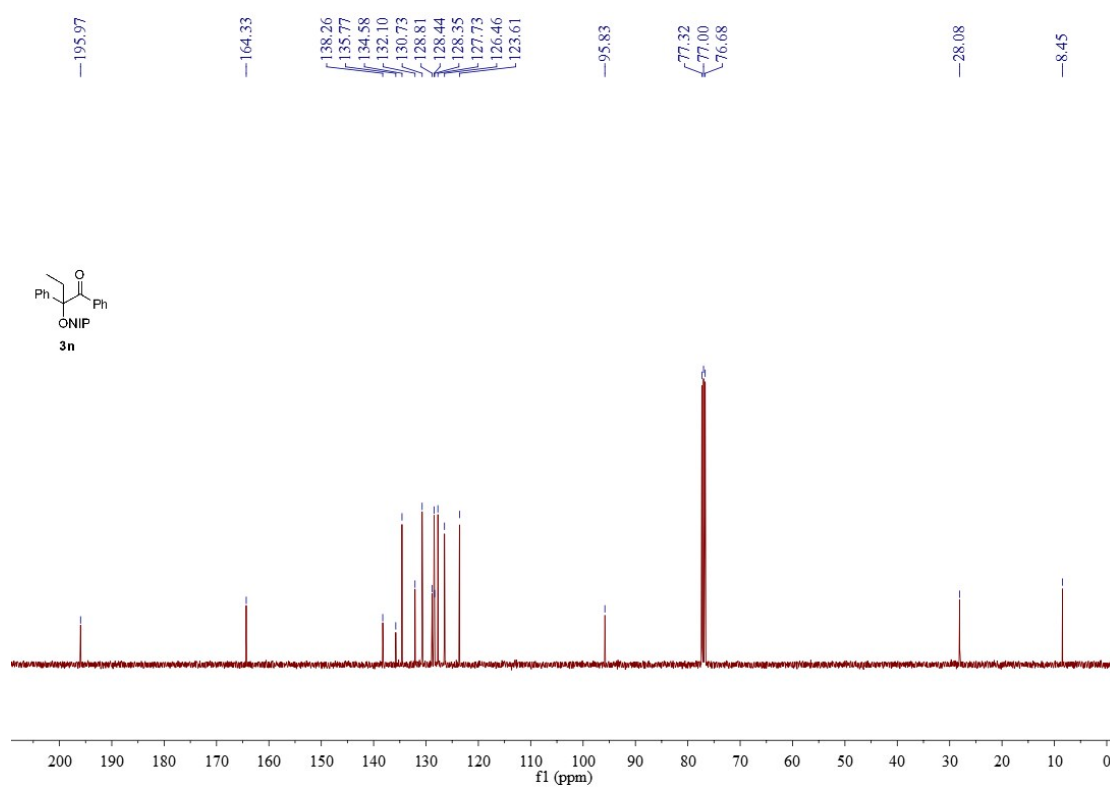

$^1\text{H}$  NMR (400MHz,  $\text{CDCl}_3$ ) spectra of **3o**

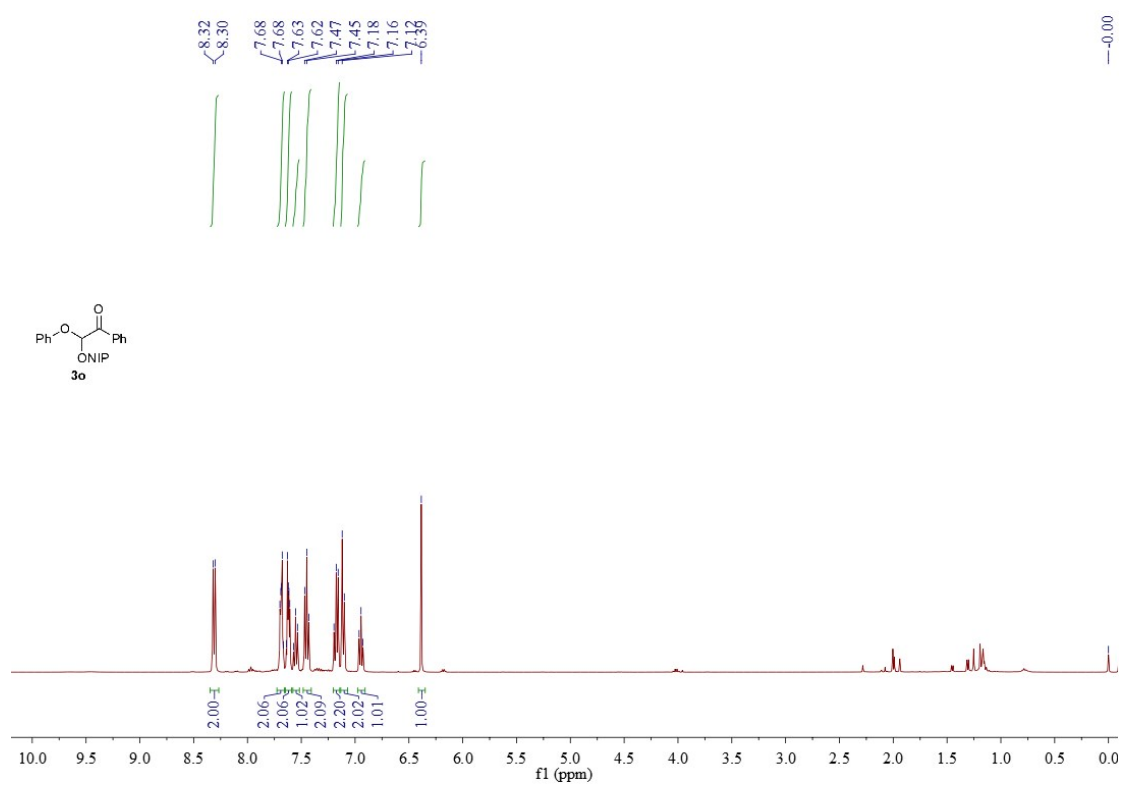

$^{13}\text{C}$  NMR (101MHz,  $\text{CDCl}_3$ ) spectra of **3o**

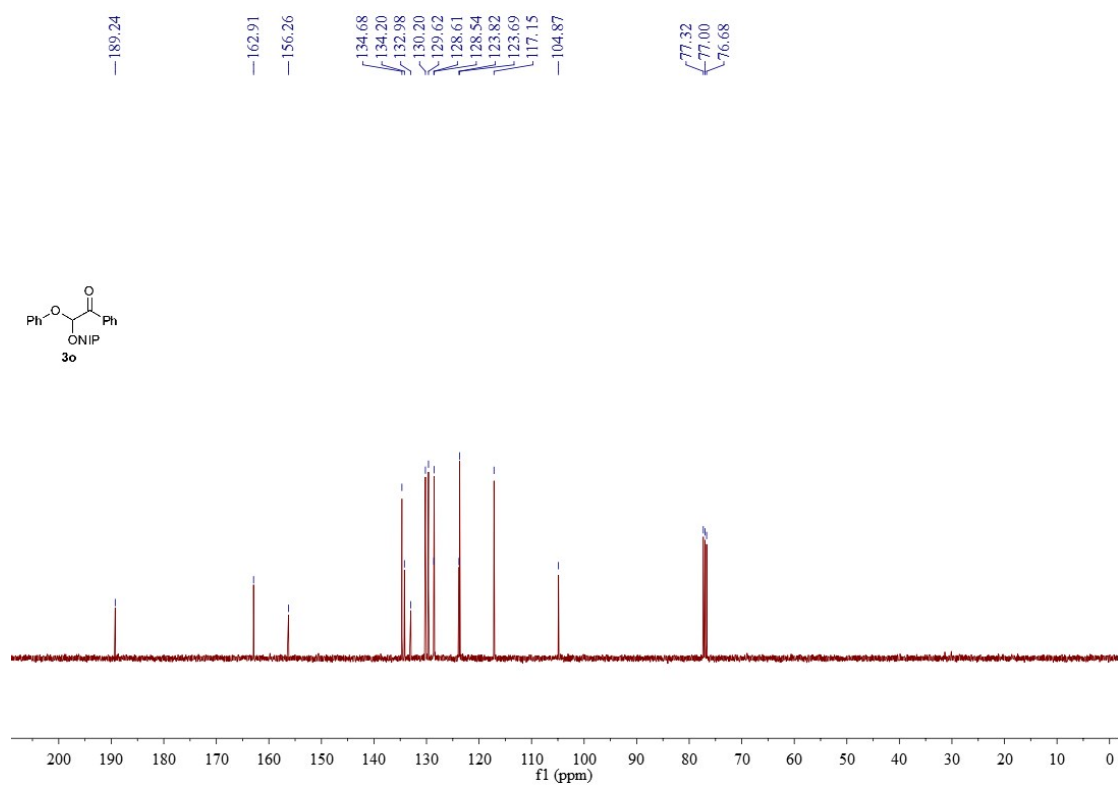

$^1\text{H}$  NMR (400MHz,  $\text{CDCl}_3$ ) spectra of **5a**

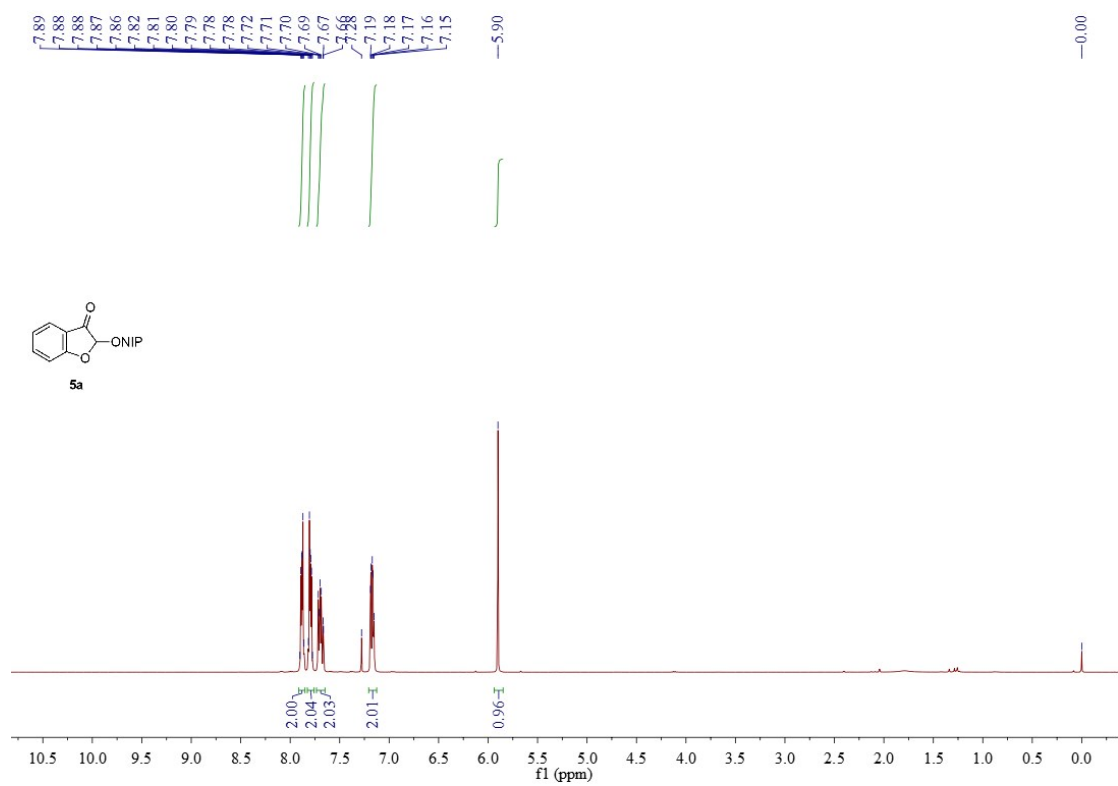

<sup>13</sup>C NMR (101MHz, CDCl<sub>3</sub>) spectra of **5a**

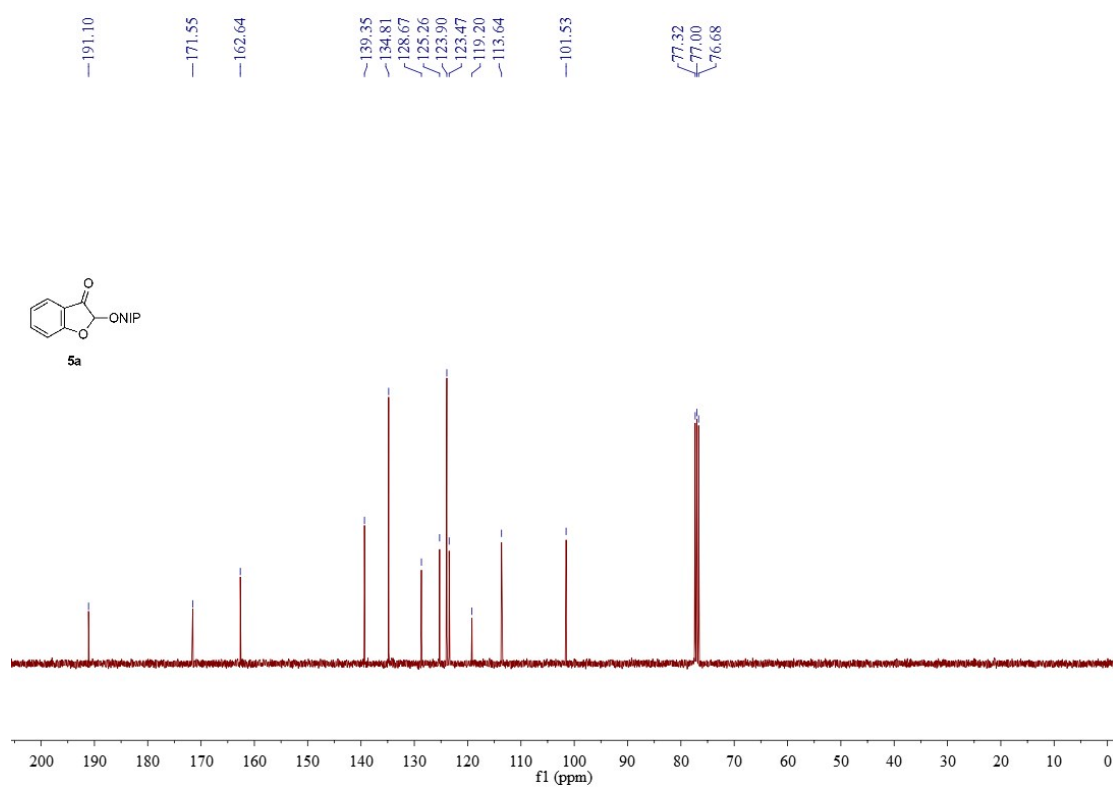

<sup>1</sup>H NMR (400MHz, CDCl<sub>3</sub>) spectra of **5b**

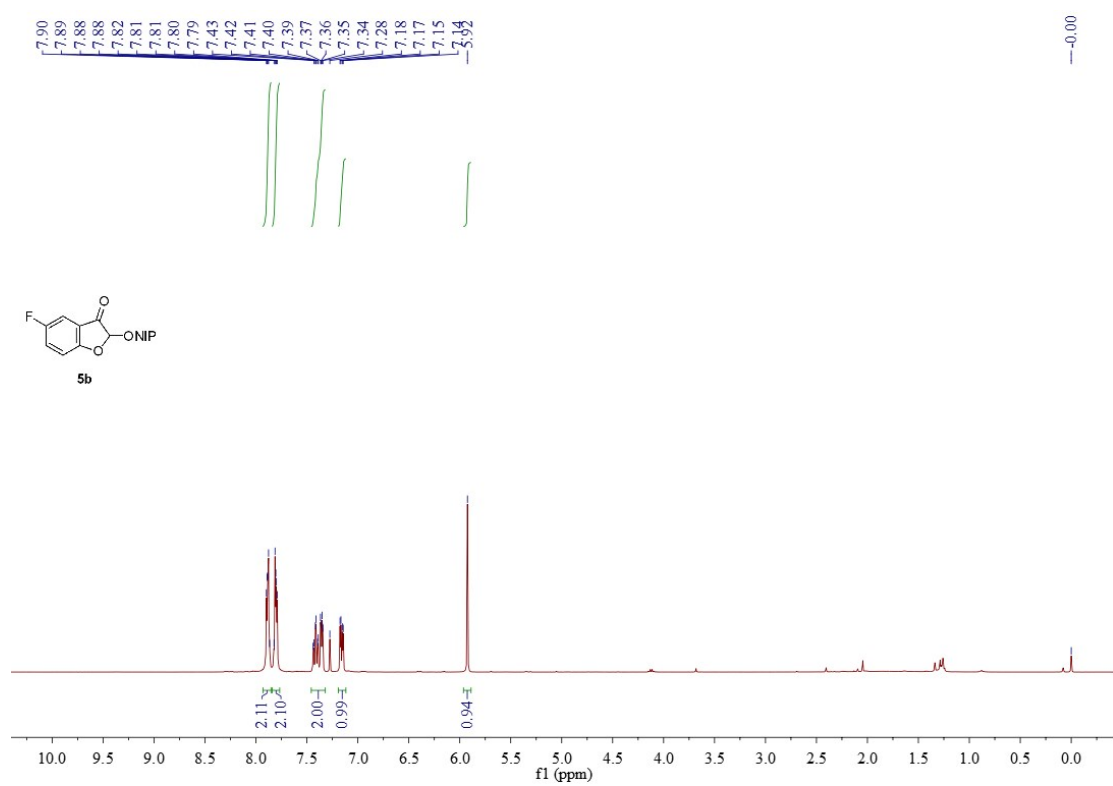

$^{19}\text{F}$  NMR (376 MHz,  $\text{CDCl}_3$ ) spectra of **5b**

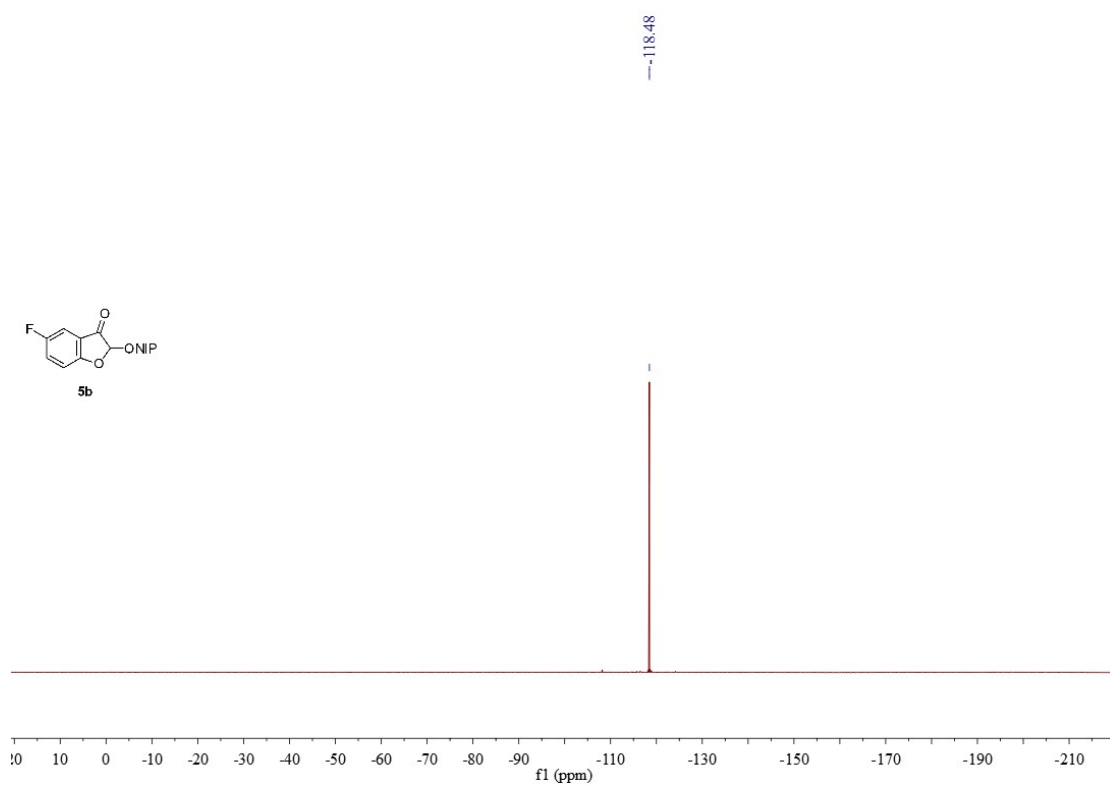

$^{13}\text{C}$  NMR (101MHz,  $\text{CDCl}_3$ ) spectra of **5b**

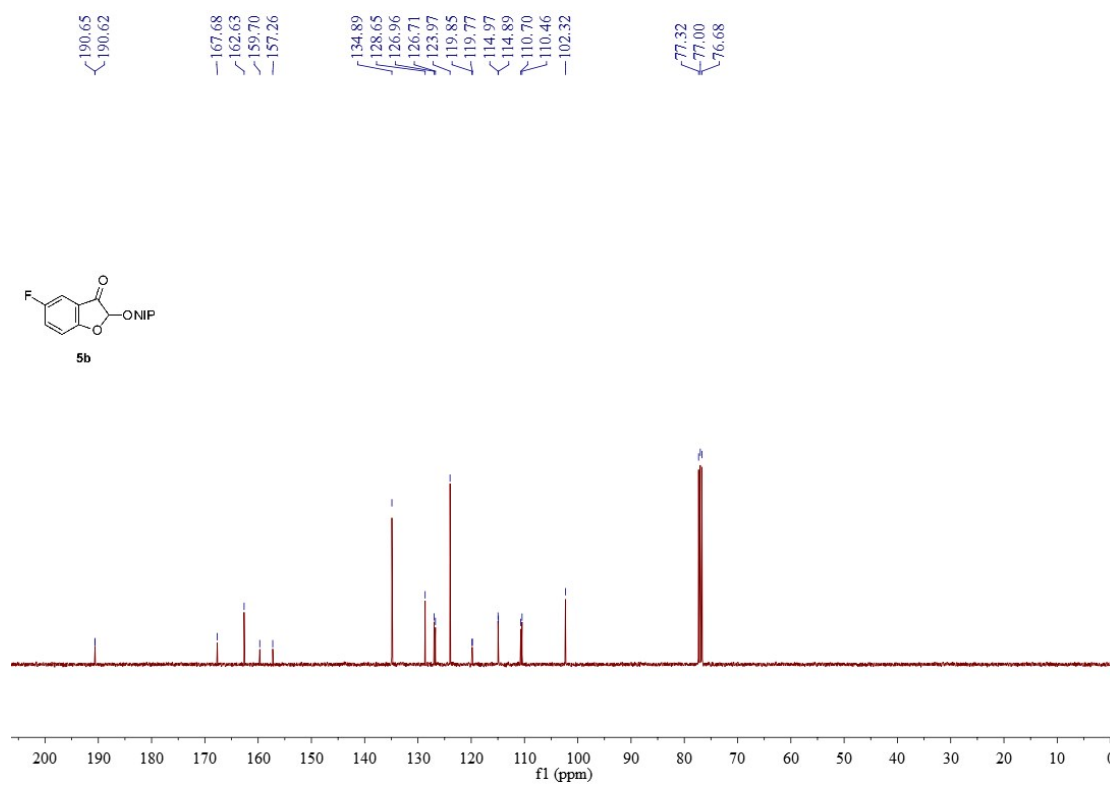



<sup>1</sup>H NMR (400MHz, CDCl<sub>3</sub>) spectra of **5c**

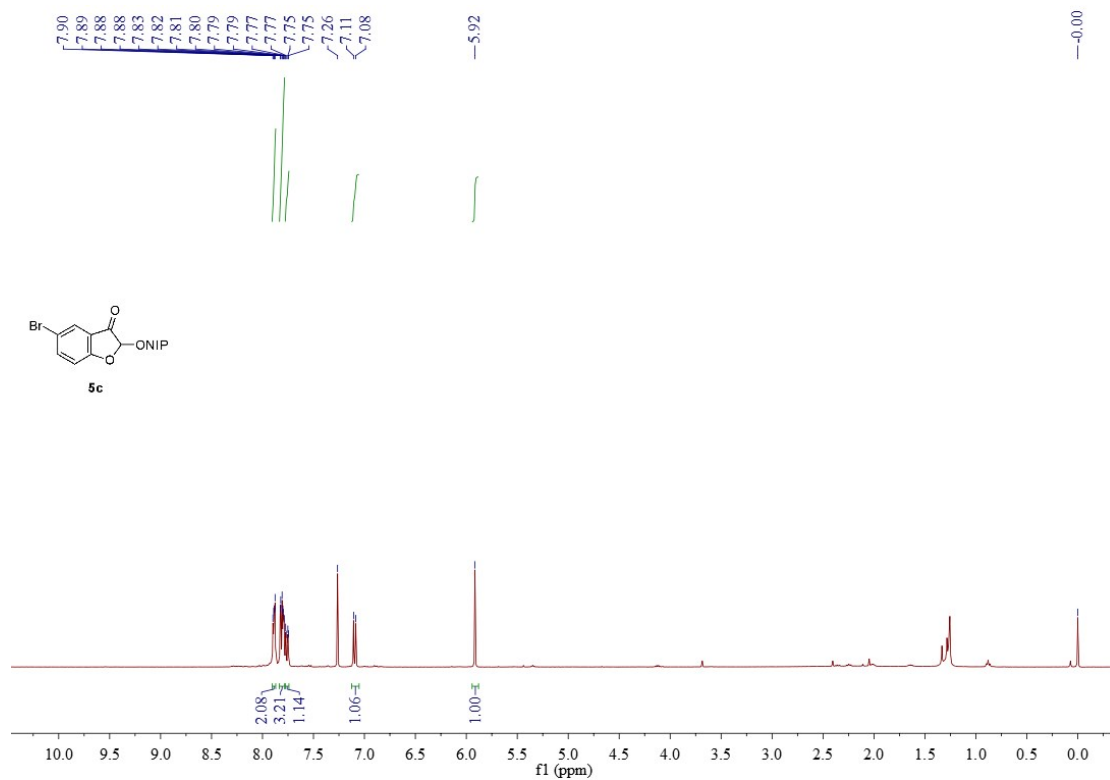

<sup>13</sup>C NMR (101MHz, CDCl<sub>3</sub>) spectra of **5c**

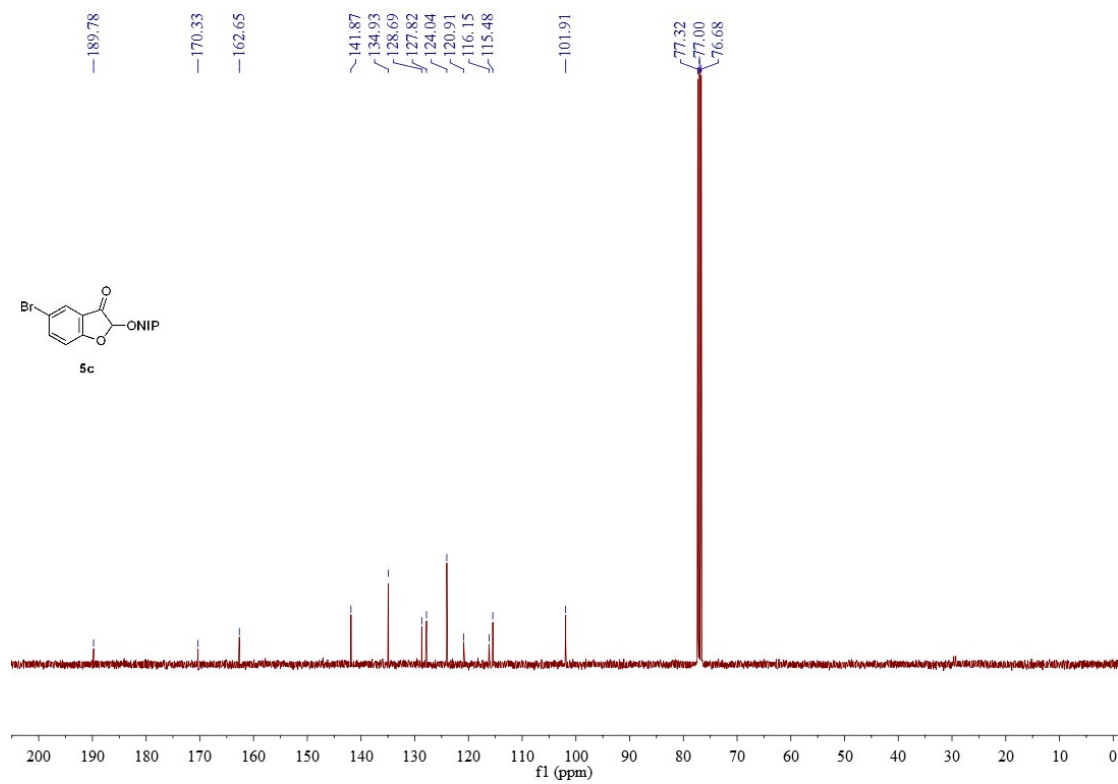

<sup>1</sup>H NMR (400MHz, CDCl<sub>3</sub>) spectra of **5d**

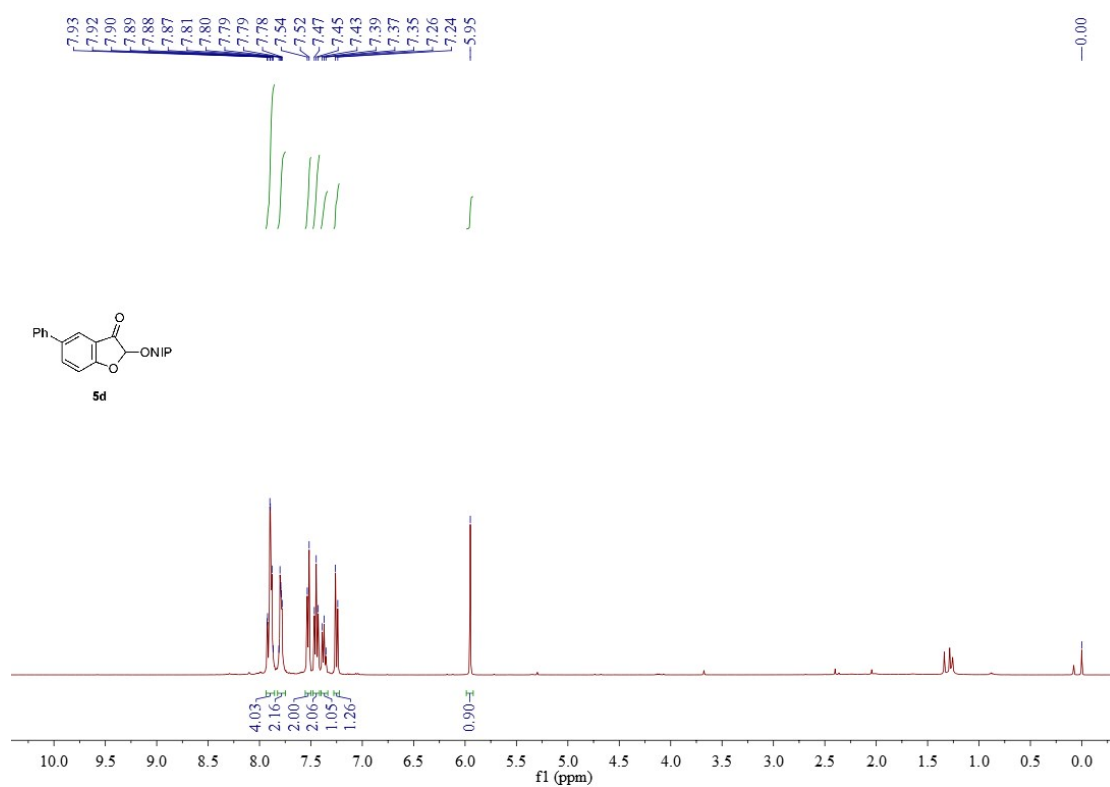

<sup>13</sup>C NMR (101MHz, CDCl<sub>3</sub>) spectra of **5d**

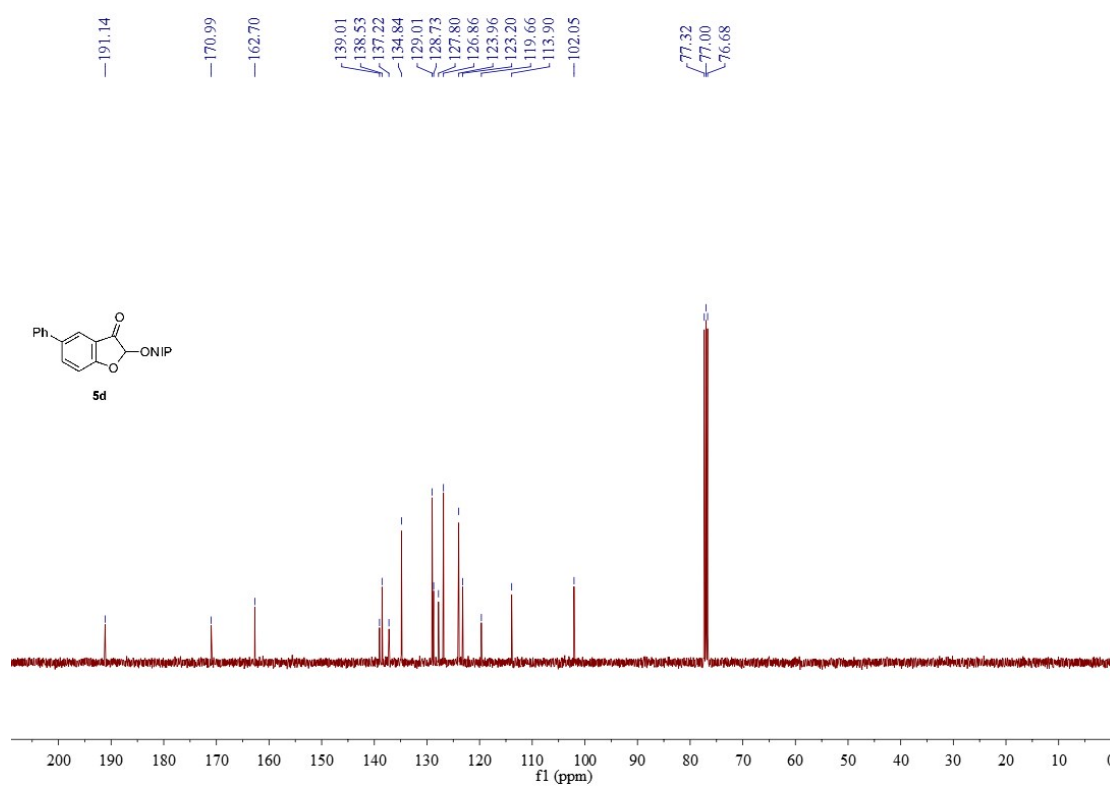

<sup>1</sup>H NMR (400MHz, CDCl<sub>3</sub>) spectra of **5e**

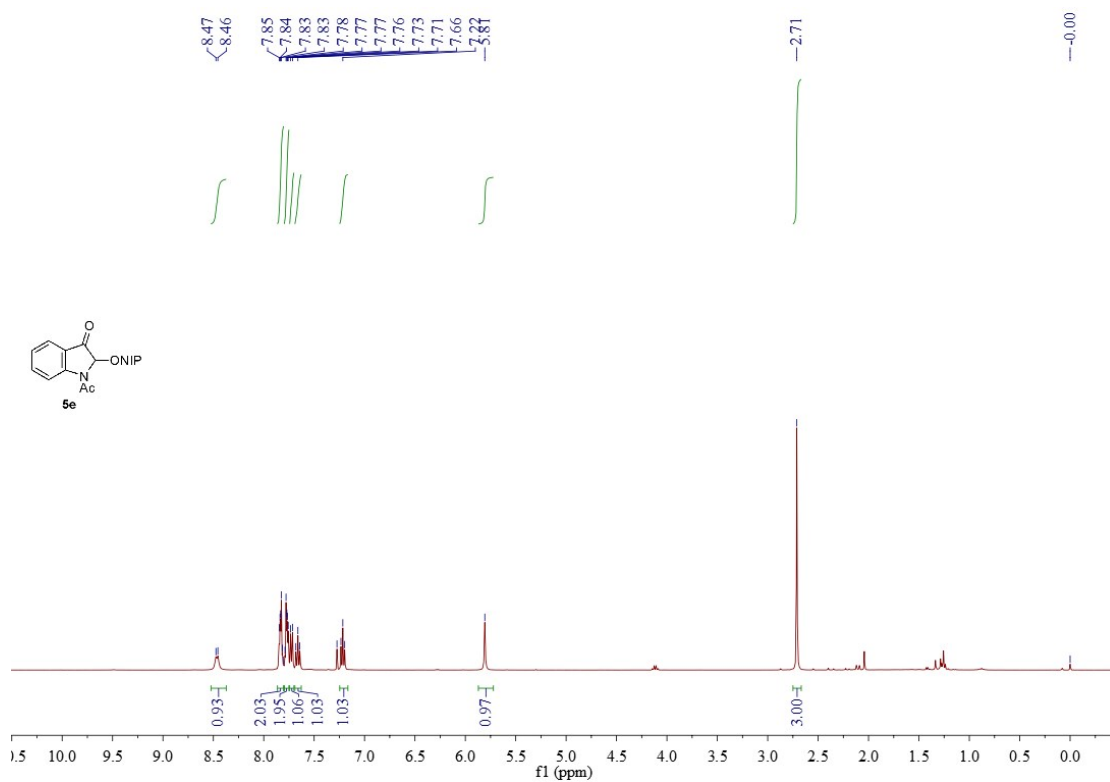

<sup>13</sup>C NMR (101MHz, CDCl<sub>3</sub>) spectra of **5e**

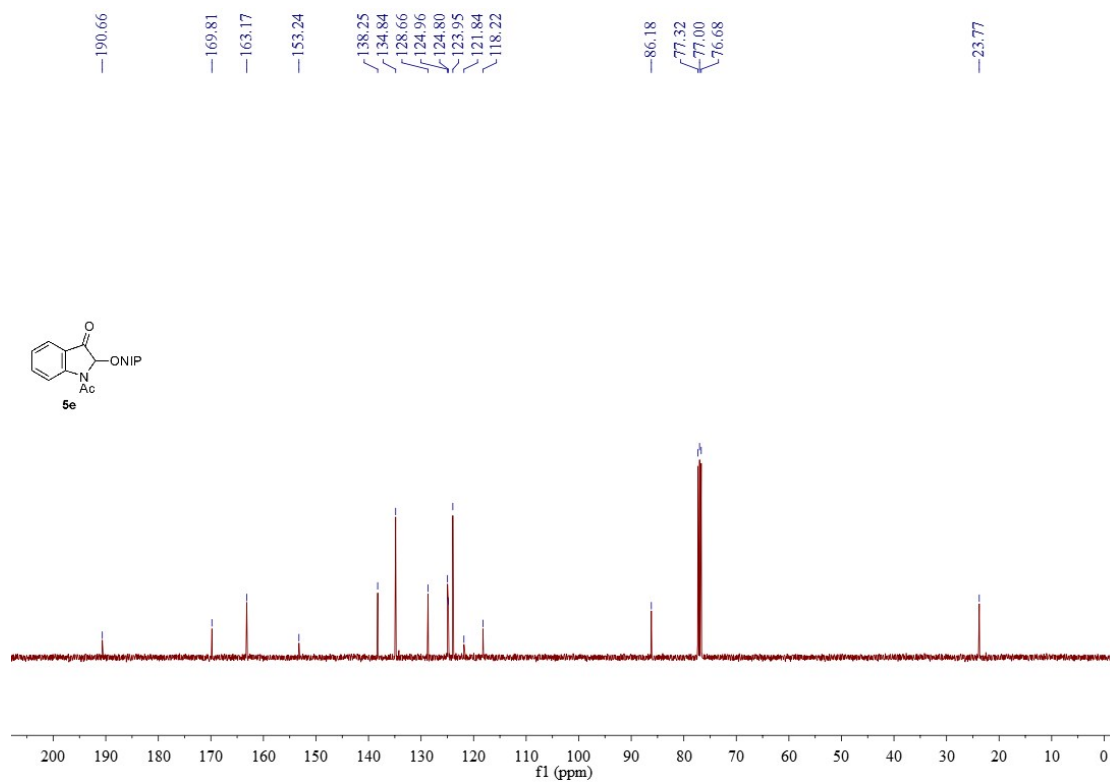

<sup>1</sup>H NMR (400MHz, CDCl<sub>3</sub>) spectra of **5f**

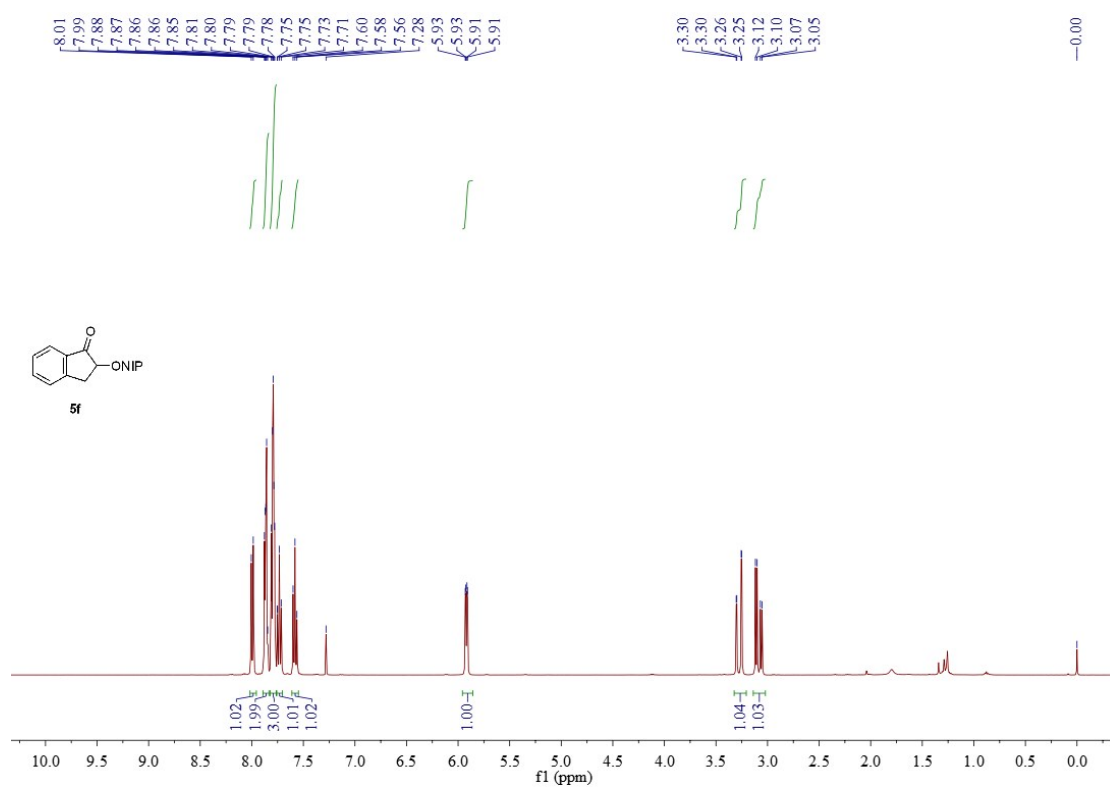

<sup>13</sup>C NMR (101MHz, CDCl<sub>3</sub>) spectra of **5f**

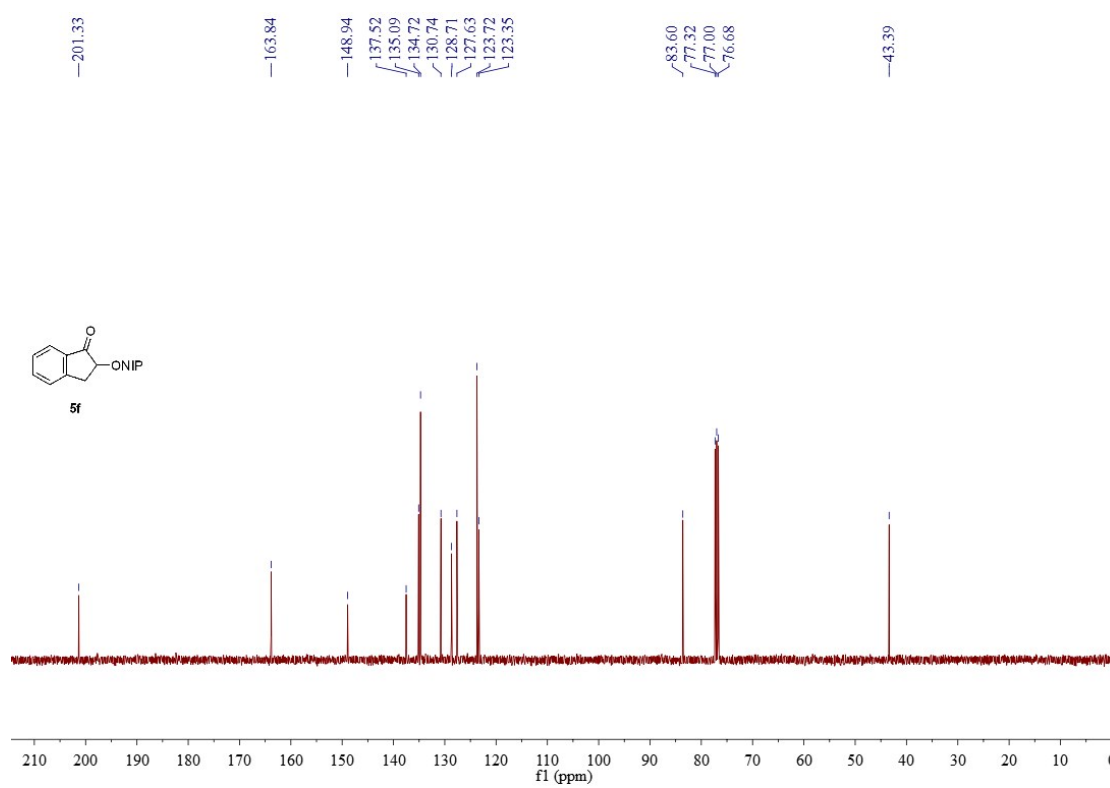

<sup>1</sup>H NMR (400MHz, CDCl<sub>3</sub>) spectra of **5g**

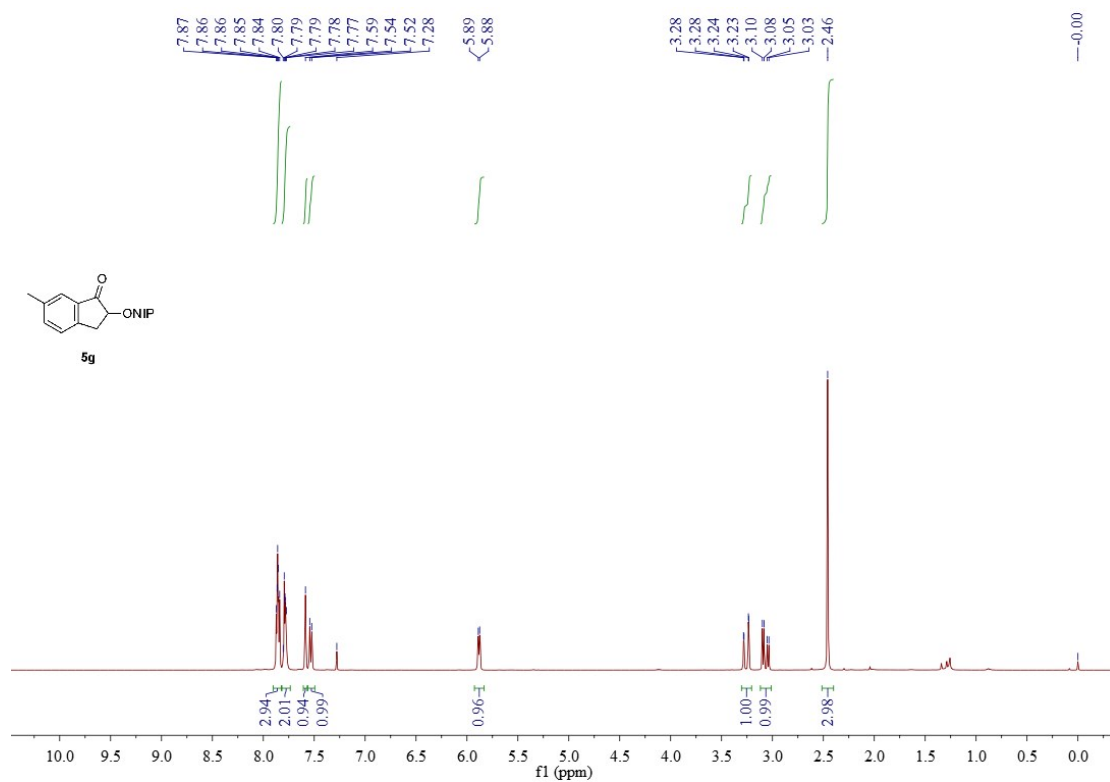

<sup>13</sup>C NMR (101MHz, CDCl<sub>3</sub>) spectra of **5g**

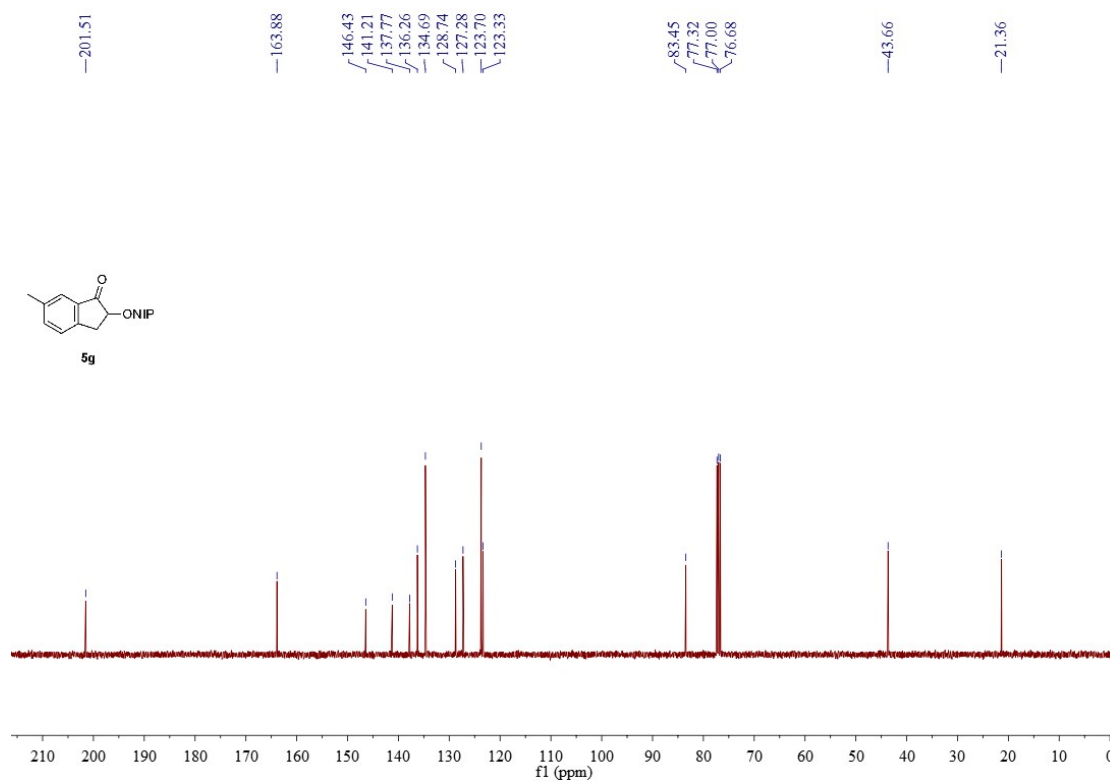

<sup>1</sup>H NMR (400MHz, CDCl<sub>3</sub>) spectra of **5h**

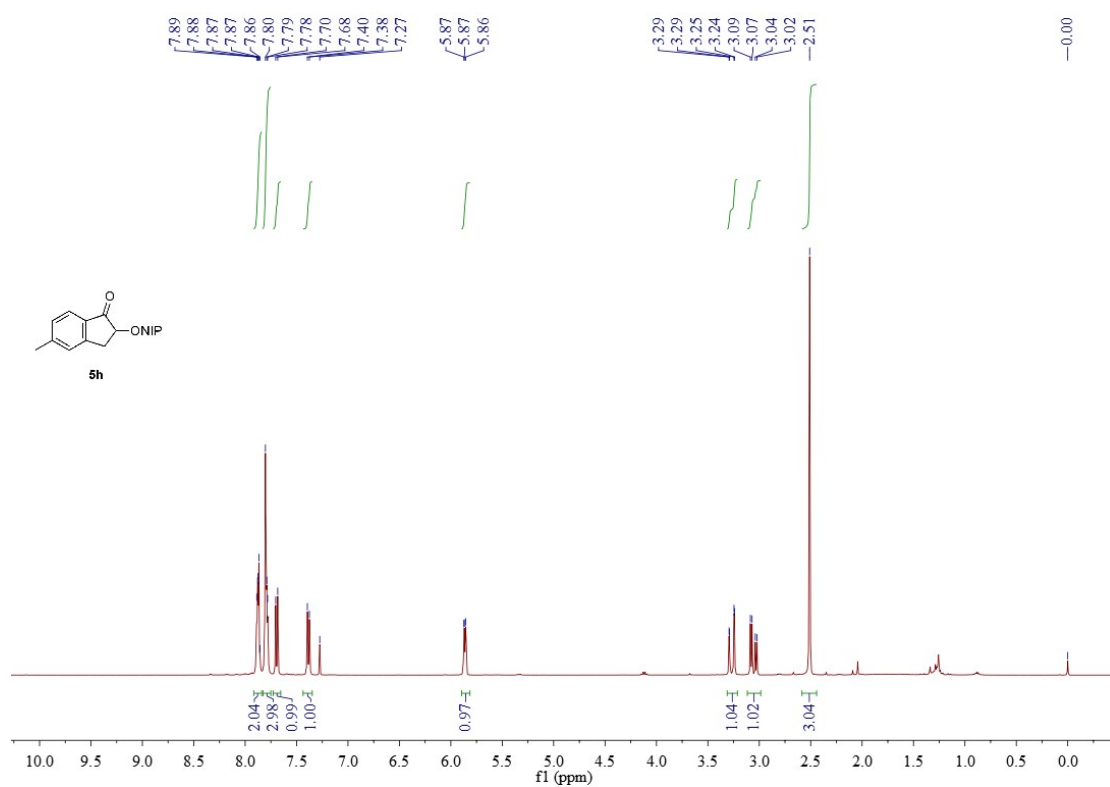

<sup>13</sup>C NMR (101MHz, CDCl<sub>3</sub>) spectra of **5h**

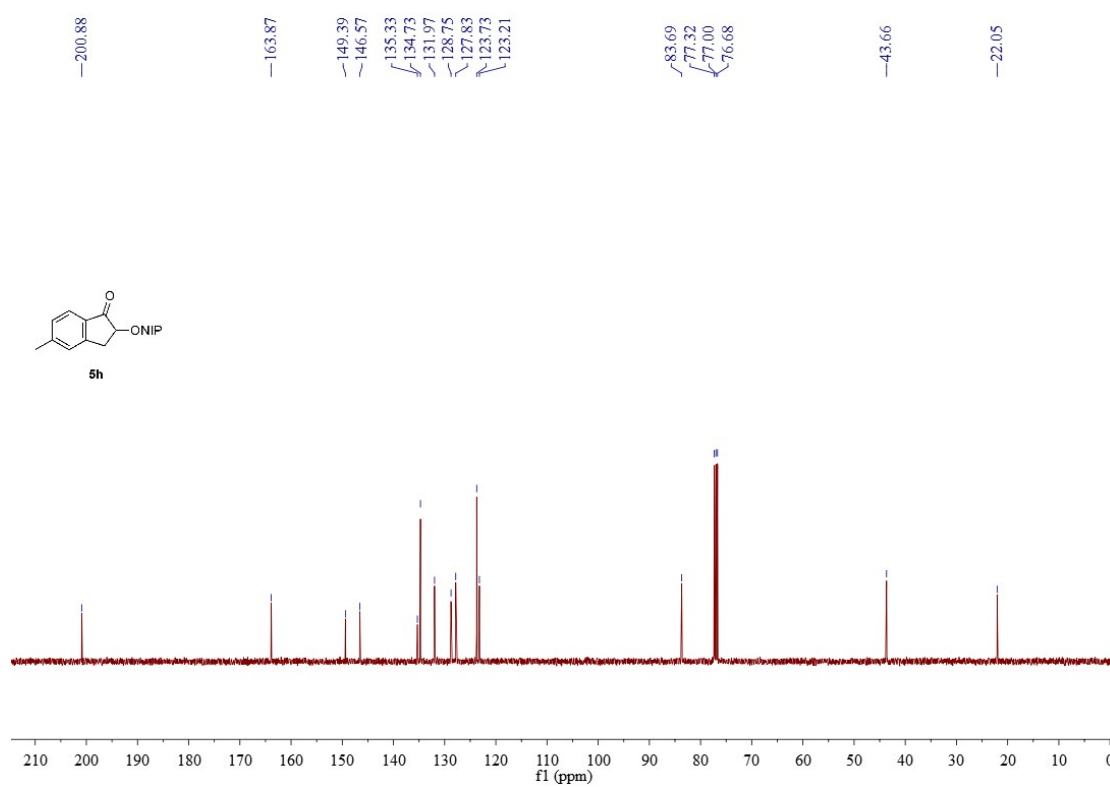

<sup>1</sup>H NMR (400MHz, CDCl<sub>3</sub>) spectra of **5i**

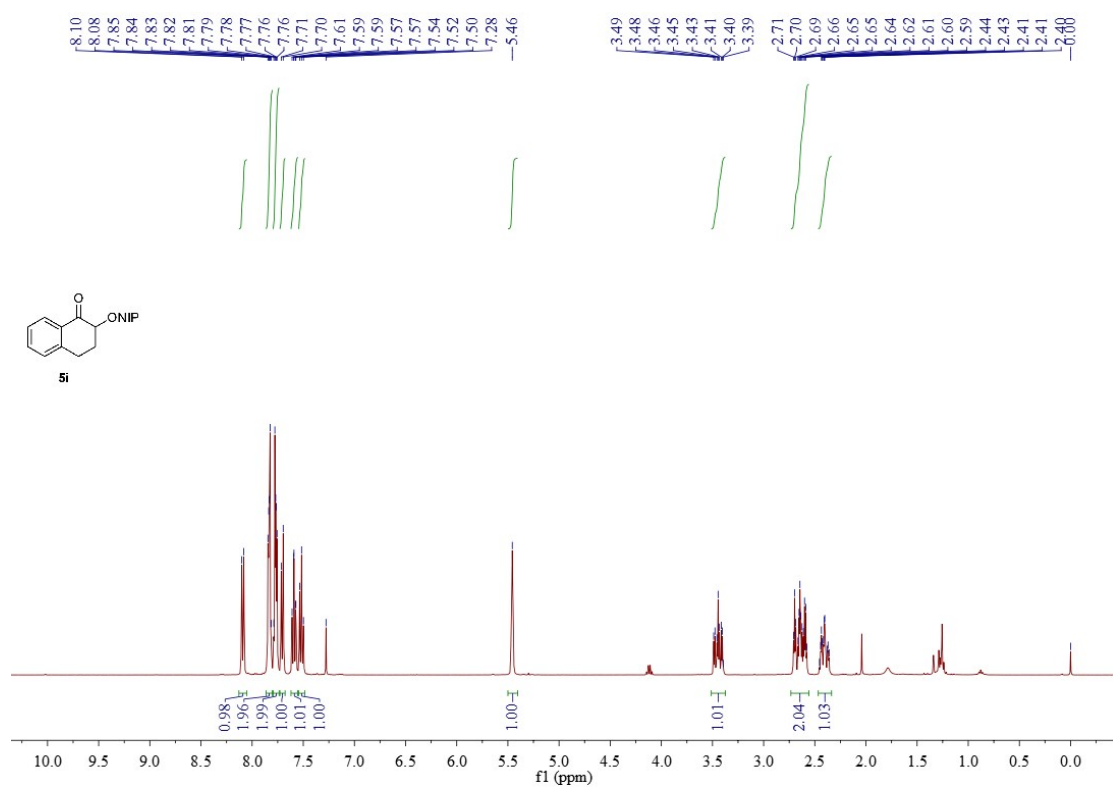

<sup>13</sup>C NMR (101MHz, CDCl<sub>3</sub>) spectra of **5i**

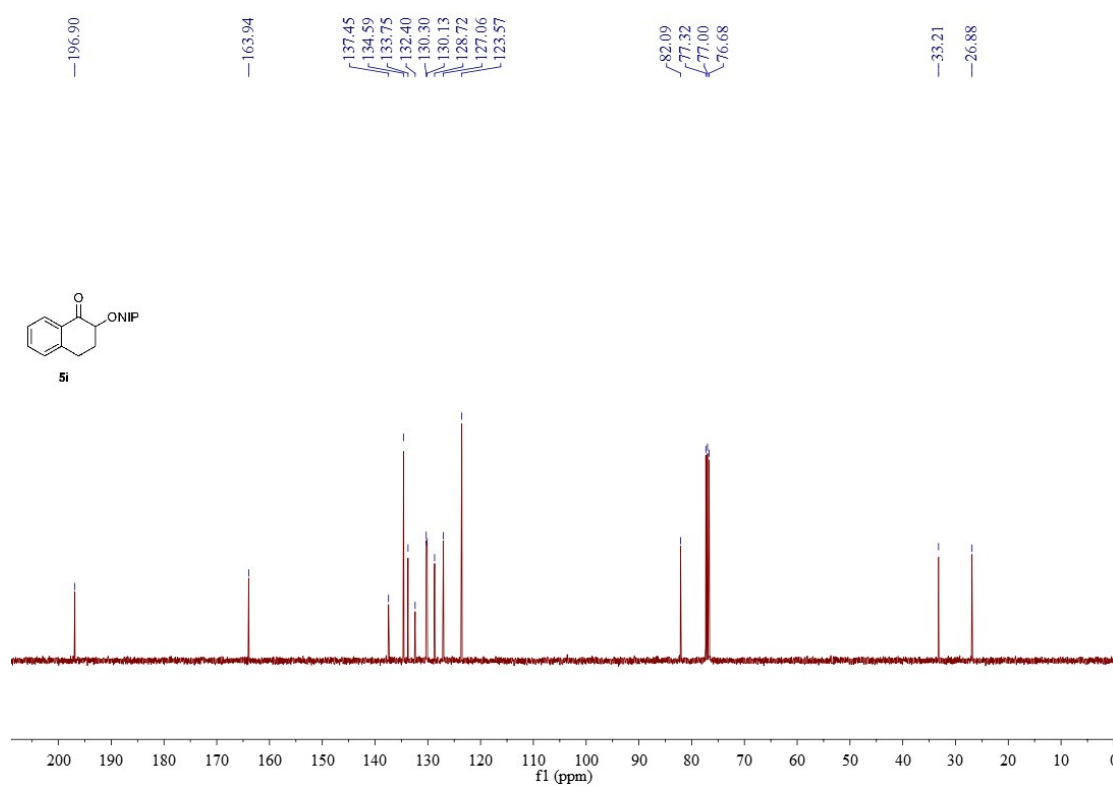

<sup>1</sup>H NMR (400MHz, CDCl<sub>3</sub>) spectra of **5j**

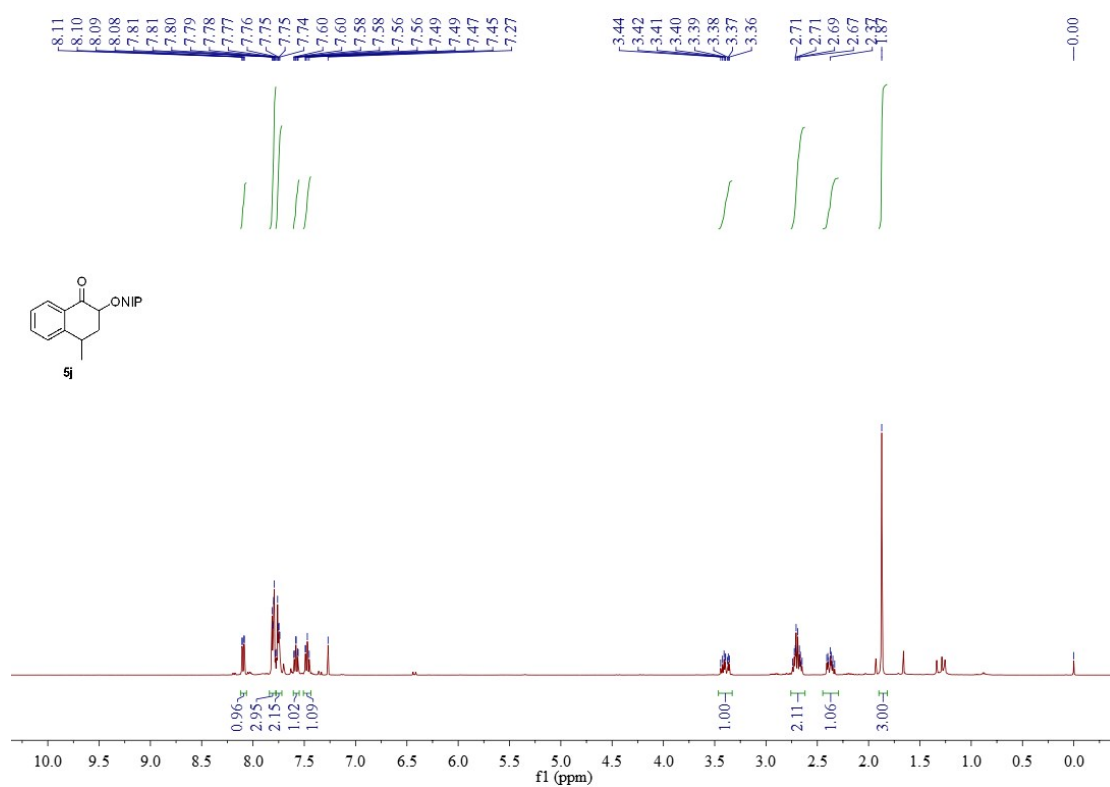

<sup>13</sup>C NMR (101MHz, CDCl<sub>3</sub>) spectra of **5j**

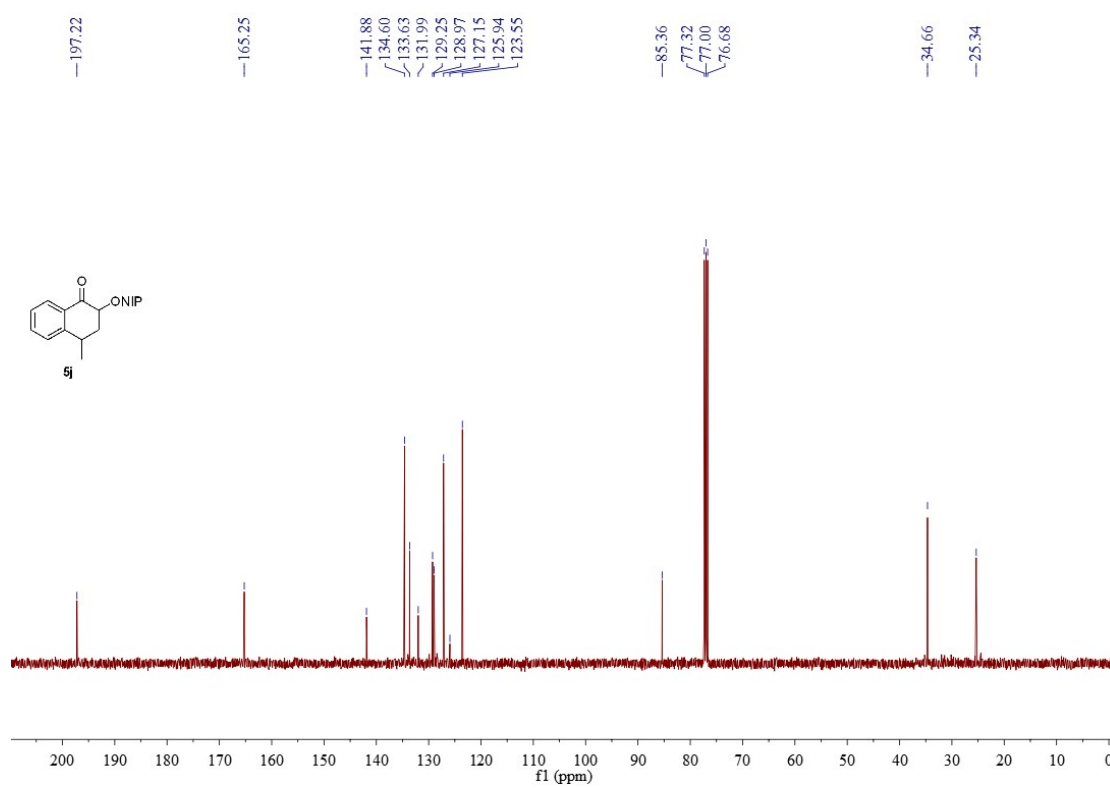



<sup>1</sup>H NMR 400MHz, CDCl<sub>3</sub> spectra of **6**

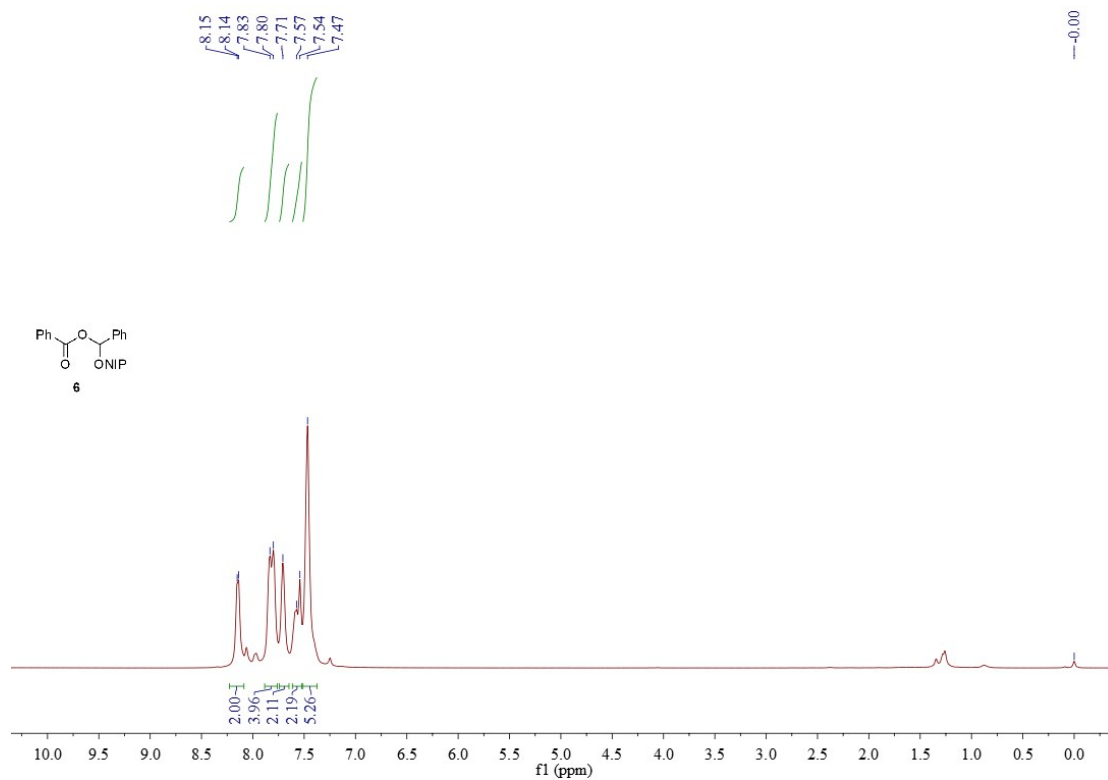

<sup>13</sup>C NMR (101MHz, CDCl<sub>3</sub>) spectra of **6**

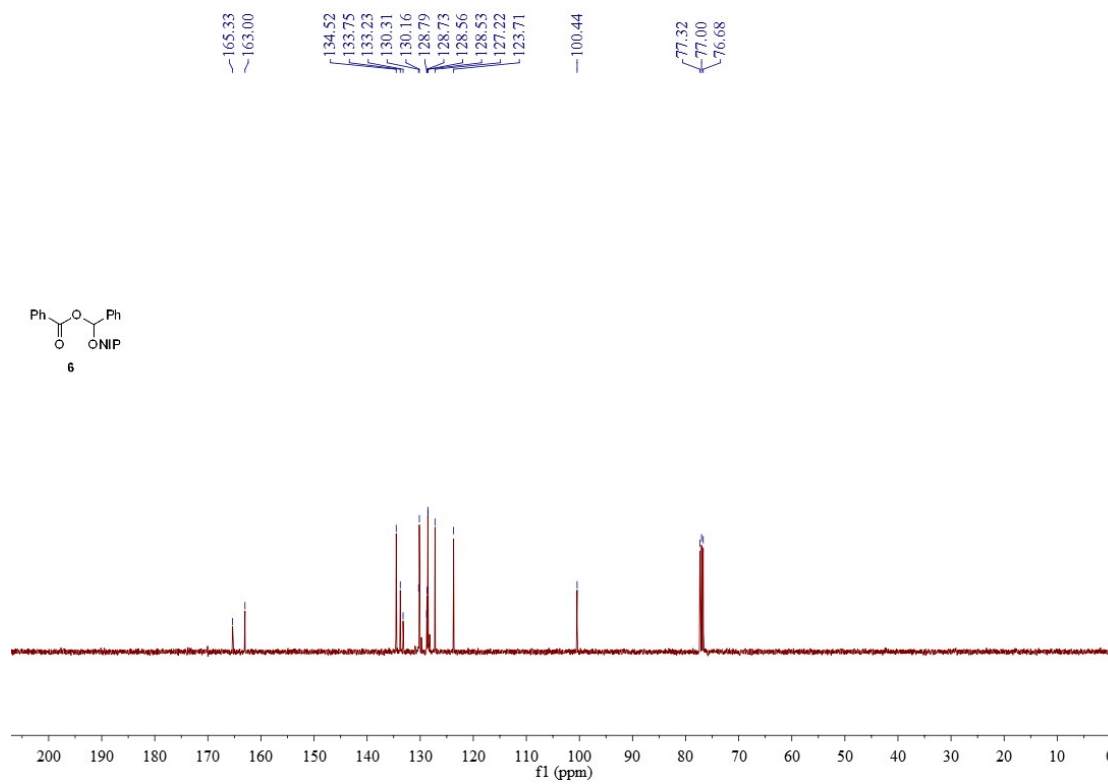

<sup>1</sup>H NMR (400MHz, CDCl<sub>3</sub>) spectra of 7

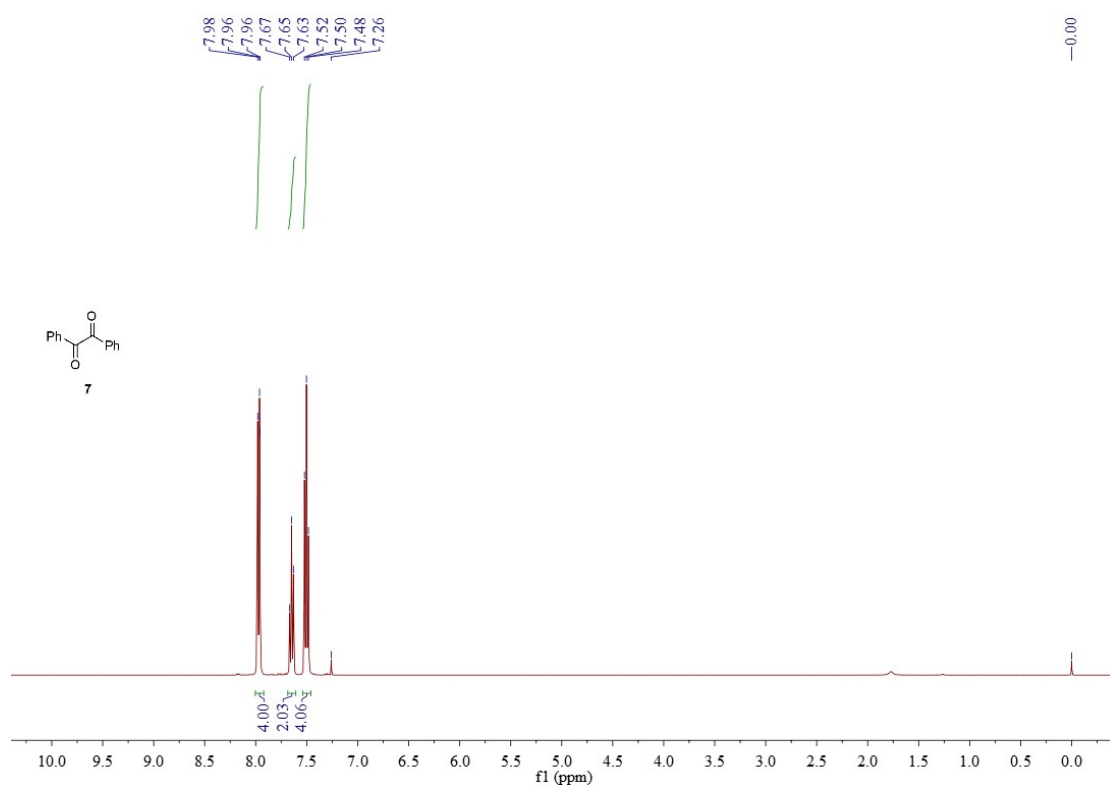

<sup>13</sup>C NMR (101MHz, CDCl<sub>3</sub>) spectra of 7

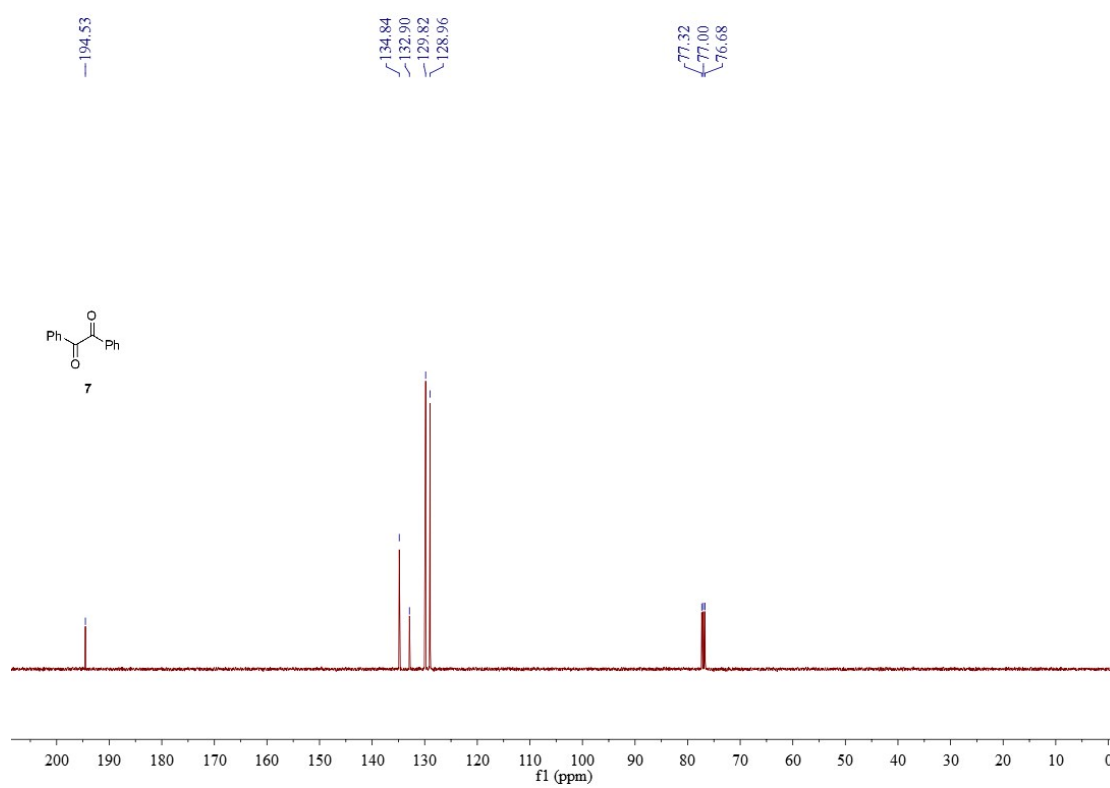

<sup>1</sup>H NMR (400MHz, CDCl<sub>3</sub>) spectra of **8**

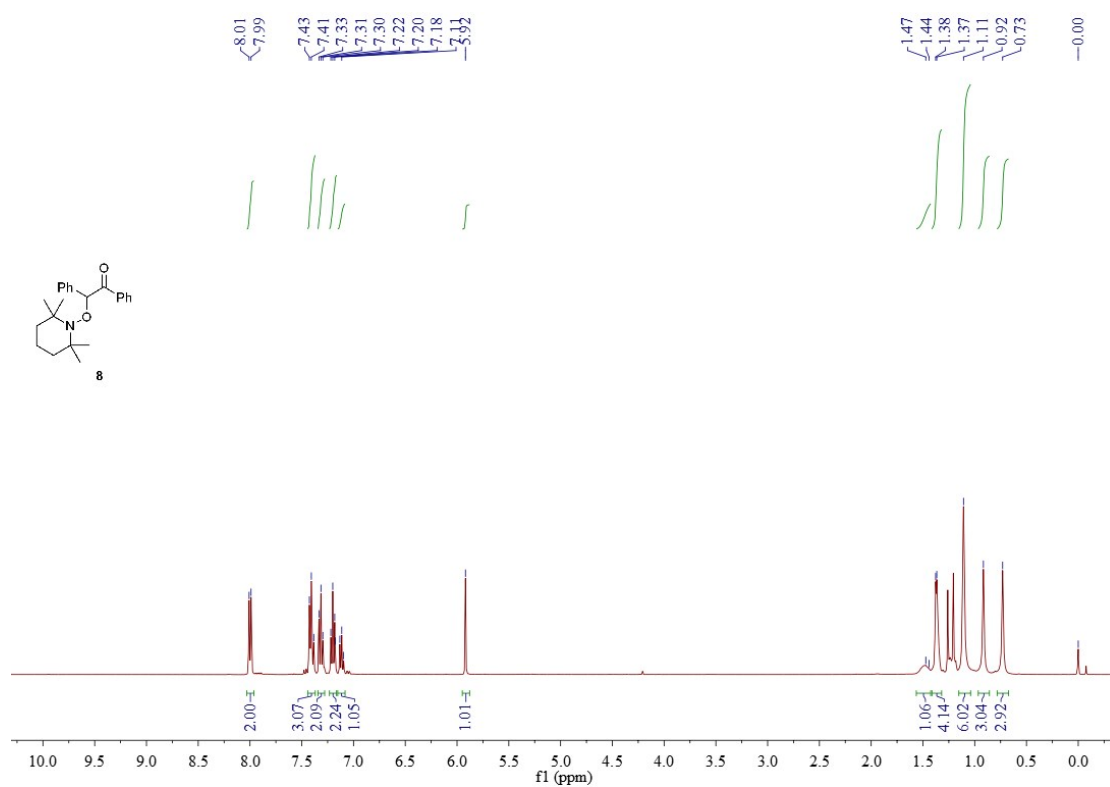

<sup>13</sup>C NMR (101MHz, CDCl<sub>3</sub>) spectra of **8**

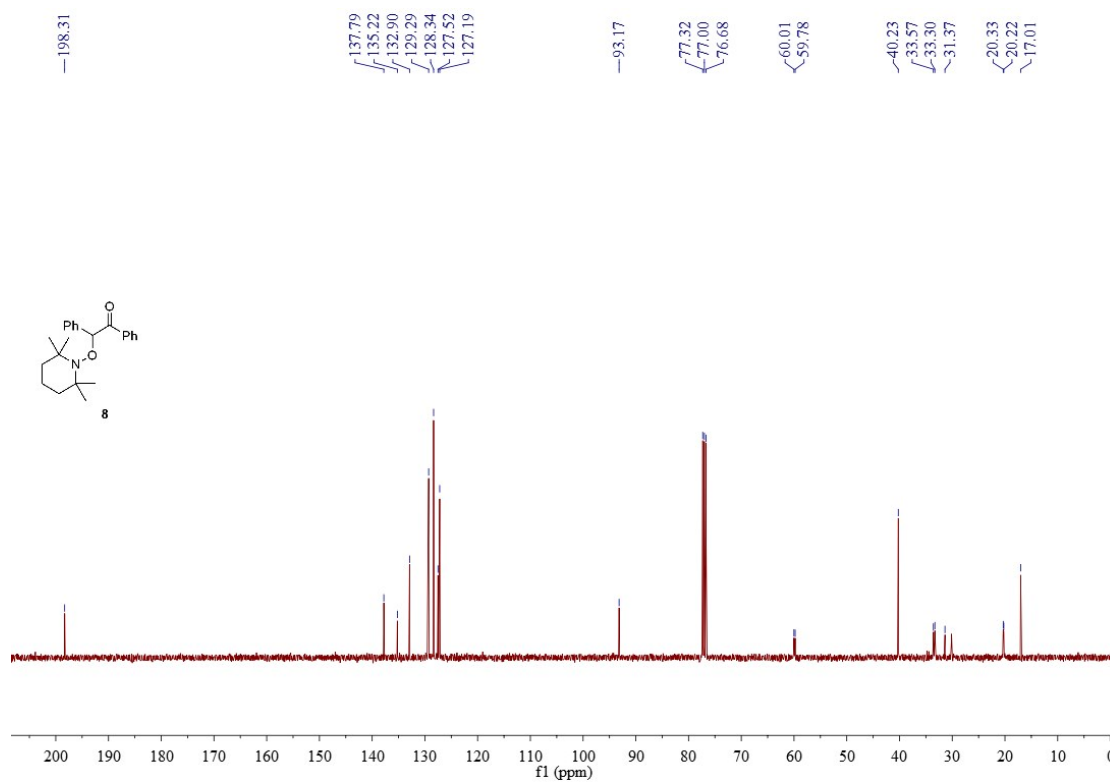

Supplement: d1ra00375e1.pdf [file d1ra00375e1.pdf]
